# Supplementary material
Source: ML conference proceedings conference paper supplement (https://proceedings.mlr.press/v164/lee22b.html)
Supplement: Supplementary file 1 [file lee22b-supp.zip]

# Assembly instructions for basket and camera setup

## Bill of materials:

- 1x2M Ethernet Patch Lead Black CAT 7
- 2x3M Ethernet Patch Lead Black CAT 7
- 3xBasler Ace acA1920-40gc camera
- 2xLENS TS0814-MP F1.4 F8mm 1"
- 1xLENS TS1214-MP F1.4 F12.5mm 1"
- 2x3D printed Front camera mount
- 1x3D printed Rear camera mount
- 1x3D printed camera base mount
- 21xM3x8mm screws
- 12xM3 Brass threaded inserts
- 3xS12x30 T50 Self Tapping Core Screw
- 1x Bosch Rexroth Cover Strip, PVC, 10mm
- 1xBasket Struts

## Basket assembly instructions:

1. Assemble the basket parts as per *picture below*. Once the acrylic parts are flush with no gaps and fitted in correct orientation, use a glue gun and glue all joints.

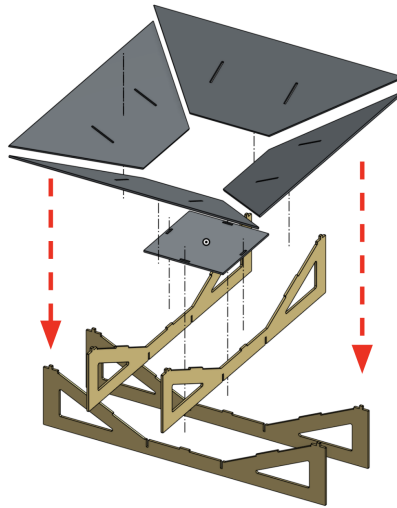

2. Next assemble the basket framework struts using the correct lengths, *please refer to the picture below*.

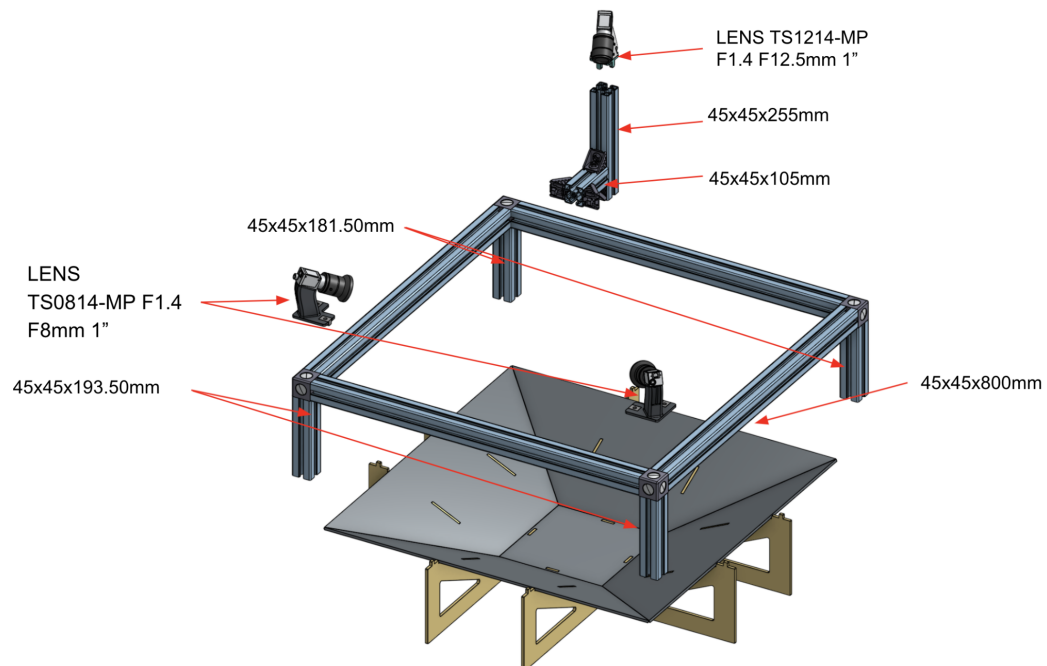

## Camera assembly instructions:

### 1. Attach Lens to cameras.

- Left front camera attach [LENS TS0814-MP F1.4 F8mm 1"](#)
- Front right camera attach [LENS TS0814-MP F1.4 F8mm 1"](#)
- Back camera attach [LENS TS1214-MP F1.4 F12.5mm 1"](#)

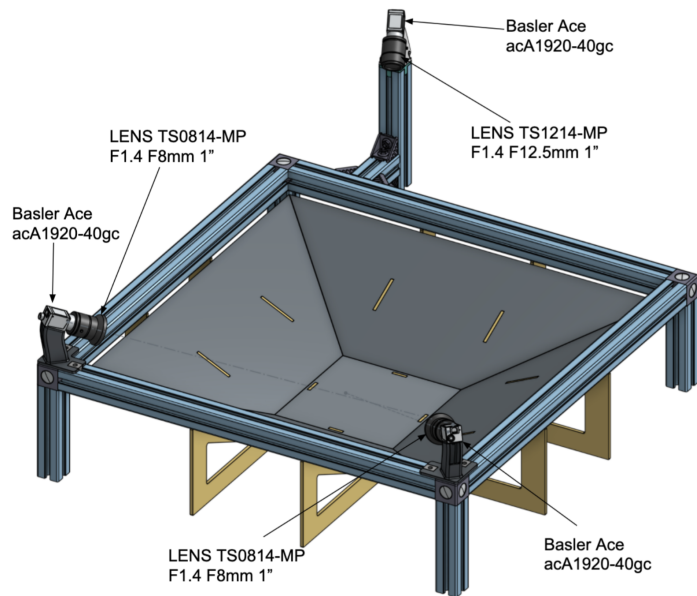

## Rear camera mount

- ### 2. Attach [Basler Ace acA1920-40gc cameras](#) with three [M3x8mm](#) screws to the 3D printed camera mount.

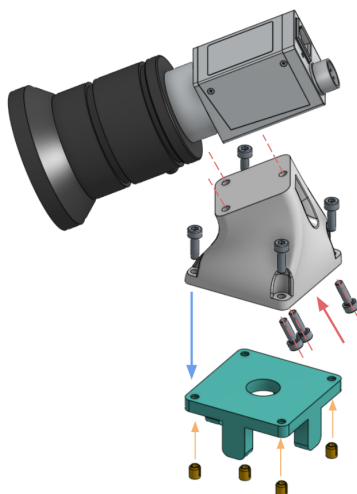

3. Screw down the 3D printed camera base mount to the camera post of the basket with one [S12x30 T50 Self Tapping Core Screw](#).
4. Use Soldering Iron tip to heat [M3 Brass threaded inserts](#) and insert them into 3D printed camera base mounts. 4 required for each base mount.
5. Screw down the printed camera mounts with camera and lens attached. Camera mounts are screwed into the camera base mount with [4 screws M3x8mm](#).

## Front camera mount

6. Attach [Basler Ace acA1920-40gc cameras](#) with three [M3x8mm](#) screws to the 3D printed camera mount.

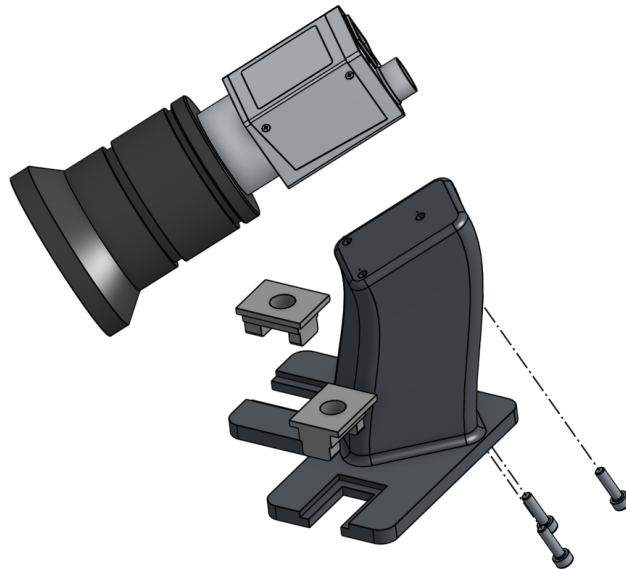

7. Install the 3D printed mount onto the 45x45mm basket strut with 2x M8x25 T-bolt and nut. Make sure the camera mount is correctly aligned with the basket.

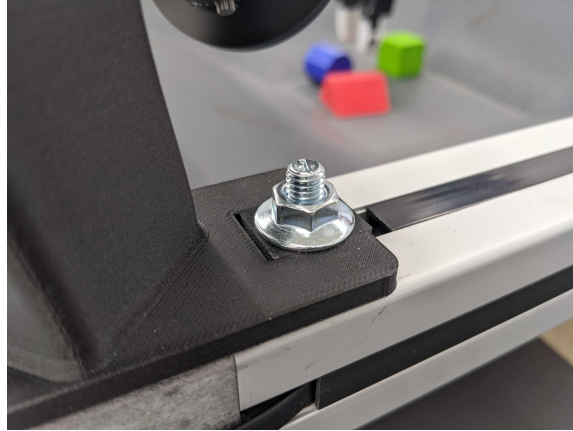

Both cameras:

8. Connect Ethernet cable to [Basler Ace acA1920-40gc](#) cameras.
  - *Left front camera plug in a [3M Ethernet Patch Lead Black CAT 7](#)*
  - *Right front camera plug in a [3M Ethernet Patch Lead Black CAT 7](#)*
  - *Back camera plug in a [2m Ethernet Patch Lead Black CAT 7](#)*
9. Feed the unplugged end of the Ethernet cable through the basket struts to the back of the basket, leaving enough slack in the cable. The cable is held in place with [plastic covers](#), which clip inside the basket struts protecting and hiding the cable. (See pic below)

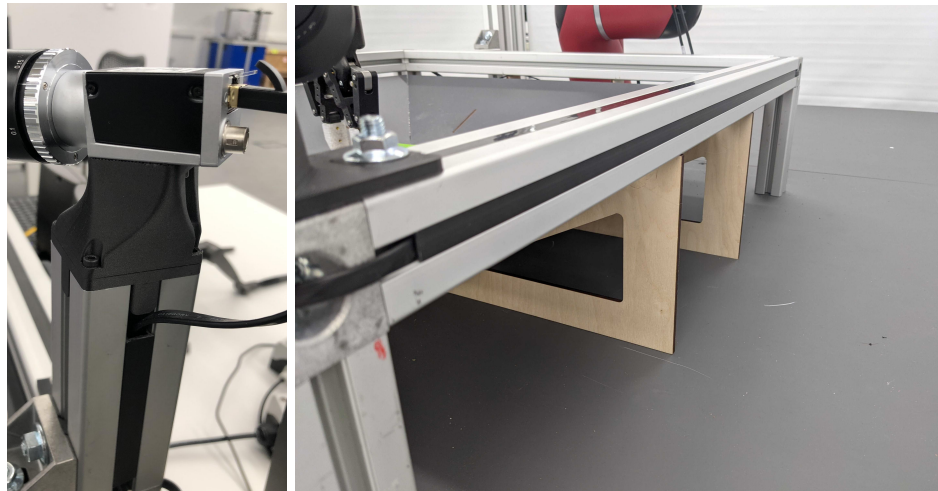

10. The unplugged end of the ethernet cable plugs into the Cisco switch (as per wiring instructions).
