# Supplementary material
Source: ML conference proceedings conference paper supplement (https://proceedings.mlr.press/v164/lee22b.html)
Supplement: Supplementary file 2 [file lee22b-supp.zip]

# Supplementary Material for Beyond Pick-and-Place: Tackling Robotic Stacking of Diverse Shapes

Anonymous Author(s)

Affiliation

Address

email

**Abstract:** We give details on the benchmark, method, implementation details and experimental results. Videos of our experimental result accompany this write-up. Our main goal with this appendix is to provide in-depth detail, both for the benchmark and for details regarding our approach. Complementary to this document, we will release designs for real cells and objects, and a simulation environment upon publication. We hope that this will facilitate adoption of the RGB-Stacking environment in the robotics research community.

## Table of Contents

|          |                                                                                 |           |
|----------|---------------------------------------------------------------------------------|-----------|
| <b>A</b> | <b>The RGB-Stacking Benchmark</b>                                               | <b>2</b>  |
| A.1      | The RGB-objects family . . . . .                                                | 2         |
| A.2      | Benchmark Analysis . . . . .                                                    | 3         |
| A.3      | Publicly Released Objects . . . . .                                             | 5         |
| <b>B</b> | <b>Environment Details</b>                                                      | <b>6</b>  |
| B.1      | Real-World Environment . . . . .                                                | 6         |
| B.2      | Environment Observations . . . . .                                              | 7         |
| B.3      | Object Position Estimation . . . . .                                            | 9         |
| B.4      | Task Evaluation . . . . .                                                       | 9         |
| B.5      | Simulation . . . . .                                                            | 10        |
| <b>C</b> | <b>Baselines</b>                                                                | <b>14</b> |
| C.1      | Human performance . . . . .                                                     | 14        |
| C.2      | Scripted Agent . . . . .                                                        | 14        |
| <b>D</b> | <b>Methods</b>                                                                  | <b>16</b> |
| D.1      | Details on Training Expert policies from State Features in Simulation . . . . . | 16        |
| D.2      | Details on Interactive Imitation Learning for Sim-to-Real Transfer . . . . .    | 18        |
| D.3      | Details on Training Improved Policies from Real Data . . . . .                  | 18        |
| <b>E</b> | <b>Experimental Details</b>                                                     | <b>18</b> |
| E.1      | Domain Randomization and Image Augmentation . . . . .                           | 18        |
| E.2      | Additional Network Architecture Details . . . . .                               | 21        |
| E.3      | Additional Training Details . . . . .                                           | 23        |
| E.4      | Detailed Real-Robot Results . . . . .                                           | 23        |

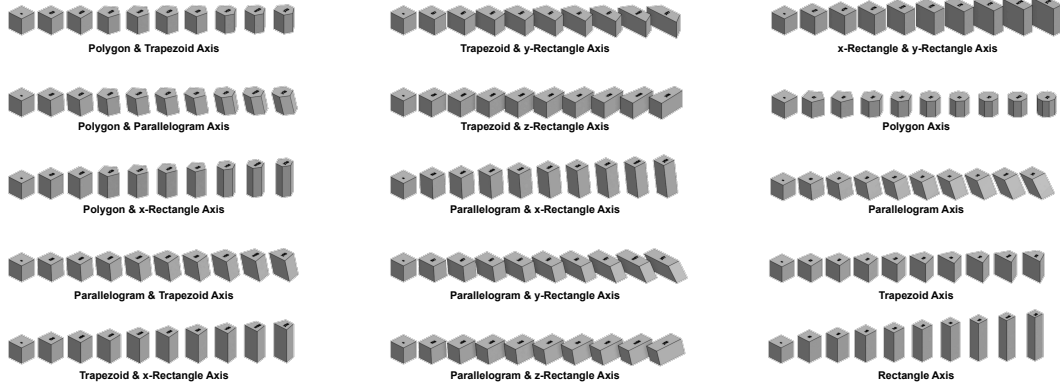

**Figure S1:** Illustration of the deformations applied for each of the 15 axes of the RGB-Objects parametric family (major axes and their unique pairwise combinations). Each deformation changes the stacking affordance of RGB-objects.

|    |                                     |    |
|----|-------------------------------------|----|
| 34 | E.5 Qualitative Analysis . . . . .  | 25 |
| 35 | F Additional Related Work           | 27 |
| 36 | G Additional Supplementary Material | 27 |
| 37 |                                     |    |
| 38 |                                     |    |
| 39 |                                     |    |

## 40 A The RGB-Stacking Benchmark

41 In this section, we provide more details on our proposed benchmark and analyze its difficulty in various ways. We qualitatively evaluate the grasping affordance based on general principles on force closure and object funnels [1], and quantitatively based on the Ferrari-Canny grasp metric [2, 3]. Similarly, we qualitatively depict the stacking affordance (Figure S5), which is varied by having 45 bottom objects, whose top flat surfaces differ in area, shape, and orientation. We also quantitatively evaluate both affordances by evaluating the stacking performance of human teleoperators in 46 simulation, and of a carefully scripted agent.

### 48 A.1 The RGB-objects family

49 The RGB-objects are all obtained by applying a certain deformation to a cube, which is our *seed object*. We have defined six major axes of deformation (see Figure S1) of the seed object, which 51 result in different shapes. These shapes can also be thought of as the vertical extrusion of a 2D shape, which is also the name of each axis. As already described in the main paper but reproduced 52 here for completion, these are:

- 54 • **Polygon-Axis**  $[N]$ : deformation obtained by transforming the extruded planar shape (i.e. the square) into a regular polygon.
- 55
- 56 • **Trapezoid-Axis**  $[\mathbb{R}_+]$ : deformation obtained by progressively morphing the planar square to a isosceles trapezoid.
- 57
- 58 • **Parallelogram-Axis**  $[\mathbb{R}_+]$ : deformation obtained by changing the orientation of the extrusion axis, from vertical (i.e. orthogonal to the plane of the planar shape) to progressively 59 more slanted axes.
- 60
- 61 • **Rectangle-Axis**  $[\mathbb{R}_+^3]$ : deformation by uniformly scaling the object along the x, y or z-axis.

62 These deformations and their combinations define a parametric family of objects. Figure S1 shows 63 a representative sampling of this family. For our *Skill Generalization* task we designate the axes of all pairwise combined deformations as the *training axes* and the ones of single deformation—the 64 major axes above—as the *held-out axes*. The training axes are Polygon & Trapezoid, Polygon & Parallelogram, Polygon & x-Rectangle, Trapezoid & Parallelogram, Trapezoid & x-Rectangle, 65 66

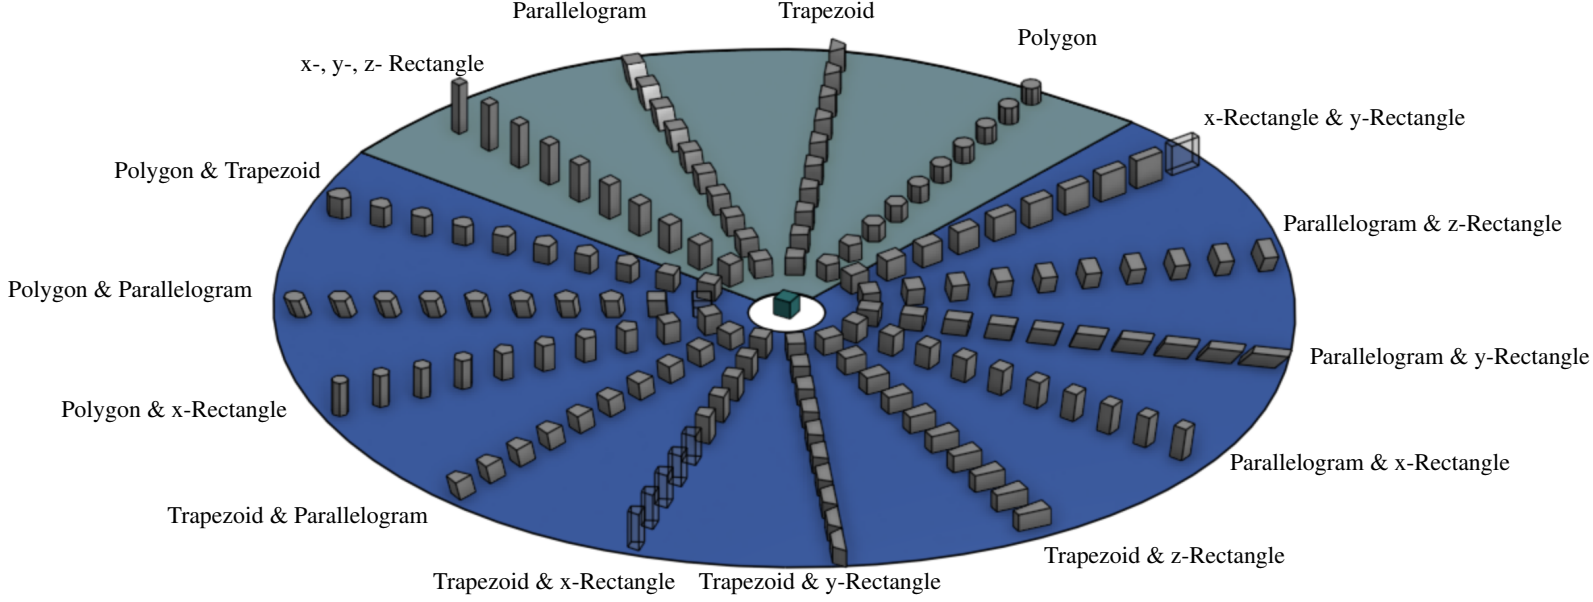

**Figure S2: The RGB-objects that are included in the benchmark grouped according to each of the 15 chosen axes of deformation.** The seed object is at the center; all the other objects are the result of deformations of this cube. These deformations change the grasping and stacking affordances of the objects. The held-out objects (major axes) are enclosed in the teal sector; the training objects (pairwise mixing of two major axes) are enclosed in the blue sector. Some objects cannot be grasped with a parallel gripper with 85 mm aperture (i.e. the Robotiq 2F-85); these objects are transparent and were omitted in our experiments.

67 Trapezoid & y-Rectangle, Trapezoid & z-Rectangle, Parallelogram & x-Rectangle, Parallelogram  
68 & y-Rectangle, Parallelogram & z-Rectangle, and x-Rectangle & y-Rectangle. Pairwise mixing of  
69 the major axes leads to objects that are duplicates and therefore we omitted certain axes and objects  
70 (e.g. the x-Rectangle & y-Rectangle and x-Rectangle & z-Rectangle axes). Also note that the x-, y-,  
71 z- Rectangle axes are the same so we refer to these as a single major Rectangle axis.

72 Based on these 15 axes illustrated in Figure S1, we created a *training object set*, which consists of  
73 103 different shapes, and a *held-out set*, containing 40 shapes. Figure S2 shows a depiction of all the  
74 objects that are included in the benchmark and were used in our experiments. The 5 specific triplets  
75 chosen for the *Skill Mastery* task belong to the held-out axes with each object in a triplet being the  
76 seed or from a different axis<sup>1</sup>. While final performance is evaluated on these 5 fixed test triplets for  
77 both tasks, during training for *Skill Generalization* we hold out not just these objects but the entire  
78 4 axes of deformation they belong to. That is, during training we can use the 103 objects from the  
79 training object set, while performance is evaluated still on the 5 specific triplet combinations from  
80 the *Skill Mastery* task.

## 81 A.2 Benchmark Analysis

82 The design principles outlined above aim at varying the resulting objects' grasp and stack affordance  
83 for a parallel gripper. In this section we qualitatively and quantitatively discuss these variations. The  
84 qualitative evaluations follow from some general principles on force closure<sup>2</sup> and object's funnel  
85 (see Mason [1] for a definition). Figure S3 shows the graphical notation which we will use to

<sup>1</sup>Technically and for legacy reasons, although the objects for the 5 triplets are sampled from the held-out axes, not all of them are actually depicted in the held-out object set illustrated in Figure S2. As seen in their figure in the main text, 3 are the seed cube object (itself held out), and 4 out of the 15 are actually in the held-out object set. These are the 4 top objects that are not the seed cube. The rest 8 objects are almost identical to existing objects in the held-out object set shown in Figure S2. In the released set of object models, these will be in their own sub-directory.

<sup>2</sup>A two-contact stable grasp is achieved if and only if Murray et al. [5, Theorem 5.6] the line connecting the contact points lies inside both friction cones (Figure S4).

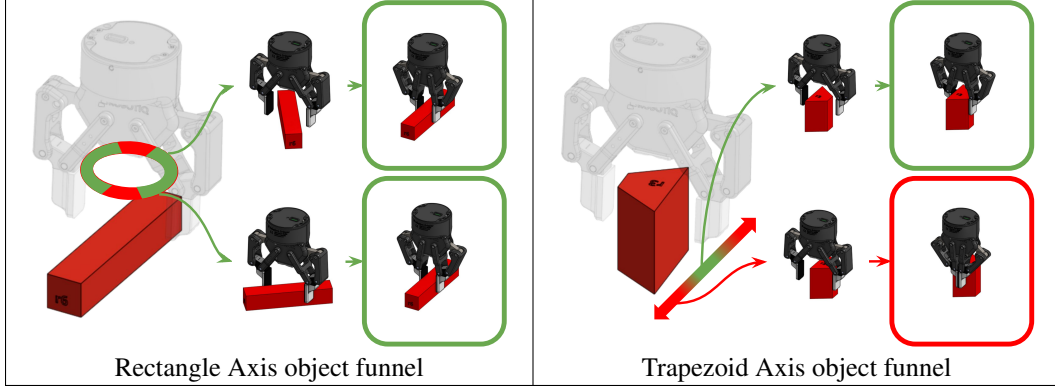

**Figure S3: A visualization of parallel-gripper grasp-affordance.** *Left:* a visualization of how the rectangle-object grasp-funnel (beam with square section) varies with the object-gripper relative orientation: successful grasps are invariant to significant orientation differences. *Right:* a visualization of how the trapezoid-object (trapezoid section) grasp-funnel varies with the object-gripper relative position: small differences in the relative pose hamper a successful grasp.

| Seed                  | Axes of Deformation   |                       |                       |                       |
|-----------------------|-----------------------|-----------------------|-----------------------|-----------------------|
|                       | Polygon               | Trapezoid             | Parallelogram         | Rectangle             |
|                       |                       |                       |                       |                       |
|                       |                       |                       |                       |                       |
| <br>$\bar{Q} = 0.132$ | <br>$\bar{Q} = 0.110$ | <br>$\bar{Q} = 0.041$ | <br>$\bar{Q} = 0.128$ | <br>$\bar{Q} = 0.045$ |

**Figure S4: A sketch of the design principles adopted to vary RGB-objects' grasp affordance as a function of the applied deformation.** *Top row:* keeping in mind object funnels for the parallel gripper, different objects tolerate different 4-DoF displacements (3D Cartesian and vertical rotation) with respect to the grasping pose visualized in picture; *in green:* displacements leading to successful grasps, *in red:* displacements leading to unsuccessful grasps. *Bottom row:* a visualization of the grasp metric used in Mahler et al. [3], Wang et al. [4]. Each grasp is visualized as a line segment penetrating the object at the grasping locations; the color of the segment corresponds to the corresponding value of the Ferrari-Canny [2] epsilon grasp metric (robust grasps in green, weak grasps in red). The displayed value  $\bar{Q}$  is the average of the epsilon metric for all visualized grasps.



| Seed                                                                              | Axes of Deformation                                                               |                                                                                   |                                                                                    |                                                                                     |
|-----------------------------------------------------------------------------------|-----------------------------------------------------------------------------------|-----------------------------------------------------------------------------------|------------------------------------------------------------------------------------|-------------------------------------------------------------------------------------|
|                                                                                   | Polygon                                                                           | Trapezoid                                                                         | Parallelogram                                                                      | Rectangle                                                                           |
|  |  |  |  |  |
|  |  |  |  |  |

**Figure S5: A sketch of the design principles adopted to vary RGB-objects’ stacking affordance. Bottom objects offer support of different shapes.** From left to right: curved support, small support, slanted support and wide support.

86 qualitatively visualize the grasp affordance with respect to the gripper-object relative pose (left) and  
87 rotation (right).

88 **Figure S4** shows this qualitative visualization for some representative RGB-objects: the seed object,  
89 and 4 maximally deformed objects of the 4 major axes. The visualization aims at showing that the  
90 seed cube is relatively easy to grasp and forgiving of significant errors in the gripper positioning. The  
91 Polygon axis requires a precise positioning but it’s relatively robust towards errors in gripper orien-  
92 tation. The Trapezoid axis offers two non-parallel faces which require accuracy in both positioning  
93 and orientation. The Parallelogram axis is designed to offer the same grasp affordance of a cube  
94 but quite different stack affordance. Finally, the Rectangle axis elongates one dimension above the  
95 gripper maximum aperture thus preventing some grasps at given orientations. Interestingly, these  
96 qualitative considerations are supported by a quantitative metric, based on the Ferrari-Canny [2]  
97 epsilon grasp metric. This evaluation is shown for each of the objects considered, using the code  
98 provided in Mahler et al. [3], at the bottom row of **Figure S4**. A high  $\bar{Q}$ , used to symbolize the av-  
99 erage metric for all grasps sampled on the object, signifies that the object evaluated is easy to grasp.  
100 A low  $\bar{Q}$ , as is the case e.g. with the Trapezoid, means that the object is harder for grasping.

101 Qualitative considerations similar to the ones done above for the grasp-affordance hold for the stack-  
102 affordance, as shown in **Figure S5**. In this case, the affordance is varied by having bottom objects  
103 the top flat surfaces of which differ in area, shape and orientation. The Polygon axis introduces  
104 a deformation which reduces the top surface and increases the likelihood of the object to roll; the  
105 Trapezoid axis just reduces the top surface and in some configuration doesn’t afford a grasp at  
106 all requiring a re-orientation to another configuration which affords a stack; the Parallelogram axis  
107 offers a stacking surface which has an off-set with respect to the center of mass and therefore requires  
108 the top object to be carefully placed to avoid objects from tipping over; the Rectangle axis offers an  
109 augmented stacking surface along one axis and a reduced one on another axis.

110 We have discussed how the shapes of objects influence their grasp and stack affordances. Other  
111 interesting affordances are needed to effectively solve these tasks: (1) the clutter affordance and (2)  
112 task-oriented affordance. *Clutter* influences affordance since only a subset of grasps is feasible in  
113 presence of obstacles (right panel in **Figure S6**). Additionally, for some objects valid grasps are  
114 not suitable for stacking and this requires our agent to perform a *task-oriented grasp* (left panel in  
115 **Figure S6**).

### 116 A.3 Publicly Released Objects

117 Instead of standardizing the objects purchase as e.g. in Çalli et al. [6], we standardize their man-  
118 ufacturing procedure. We will be releasing the RGB-Objects described above and used in our ex-  
119 periments, depicted in their entirety in **Figure S2**. We decided to choose the objects to be uniform  
120 color and eventually chose only three colors: red (top objects), green (distractor objects) and blue  
121 (bottom objects). This facilitates manufacturing since each object can be manufactured with a stan-

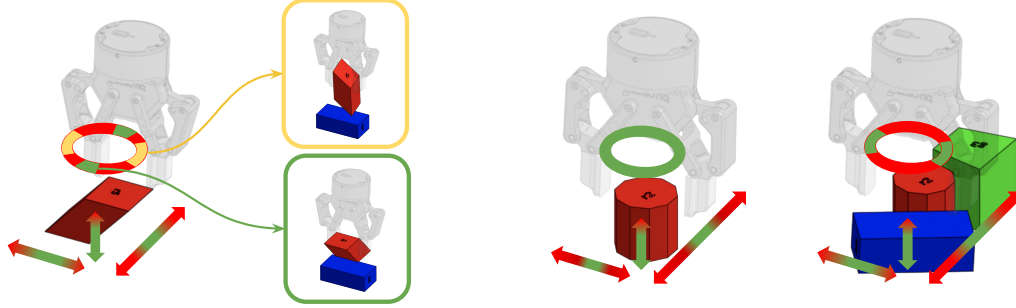

**Figure S6:** *Left:* a visualization of good stacking-oriented gripper orientations (in green) and good only-for-pick&place gripper orientations (in yellow) for the slanted cylinder. *Right:* a sketch to visualize how affordances vary in the clutter; only a subset of grasps are possible in the clutter.

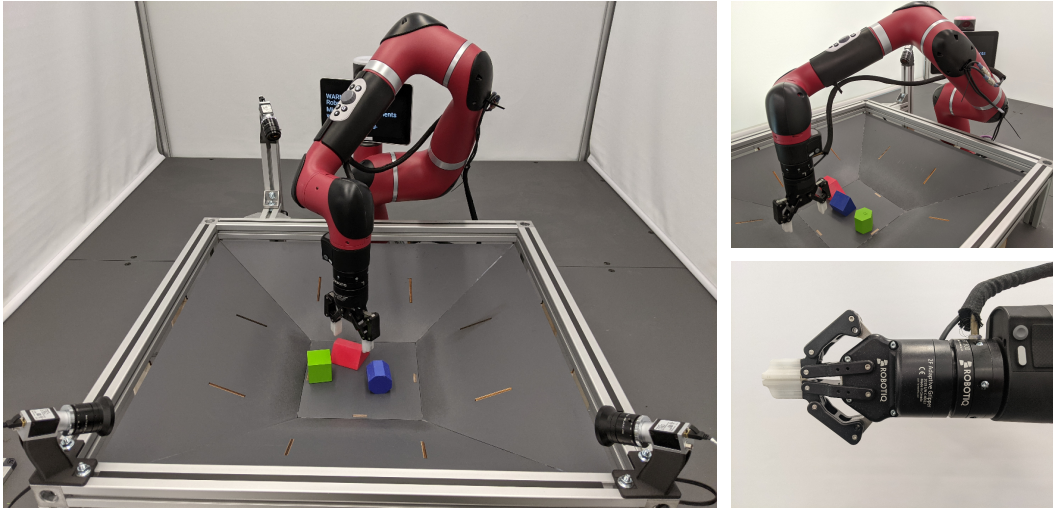

**Figure S7: Overview of the physical system.** *Left:* Front view of the basket. *Top right:* Neutral pose towards which the Cartesian controller's null-space is biased. *Bottom right:* Detail view of the endpoint tooling: force-torque sensor and gripper with custom fingertips.

122 dard 3D printer, a single filament and no additional assembly steps. Additionally, we can provide, to  
 123 interested researchers, instructions on how to have such objects 3D-printed by an external vendor.

## 124 B Environment Details

125 In the following, we are going to describe the components of the robot setup that was used to conduct  
 126 experiments, as well as technical considerations such as the procedure for automated evaluations,  
 127 specifics of the actions and observations exposed to the agent, and reward computation.

### 128 B.1 Real-World Environment

129 The environment in the real world consists of a robot arm with a gripper, a set of sensors and a  
 130 basket (Figure S7), chosen both for their durability to allow continuous and autonomous operation  
 131 and for safe interaction with human operators.

132 *Robot arm:* assuming that exploration and manipulation require a certain level of physical inter-  
 133 action, we have chosen a robot capable of sensing, controlling and enduring the forces exchanged  
 134 with the surroundings and the manipulated objects. We eventually selected the Sawyer from Rethink  
 135 Robotics<sup>3</sup>, both for its force and torque sensing capabilities and its use of series elastic actuators that  
 136 provide passive compliance.

<sup>3</sup>The Sawyer is now developed and retailed by the Hahn Group.

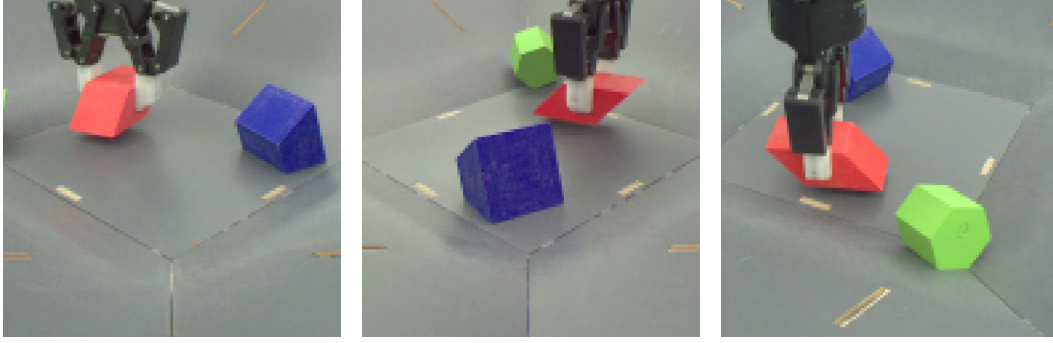

**Figure S8: Example image observations provided to the agent.** These are captured from the basket cameras, then cropped and sub-sampled to  $128 \times 128$ . From left to right: front left view, front right view, and back left view. In this work, we only used the front views.

137 *Gripper:* the gripper chosen is a Robotiq 2F-85 which guarantees industrial robustness while allow-  
 138 ing additional interaction through a passive-spring retracting degree of freedom. It is outfitted with  
 139 custom fingertips printed from nylon, as the stock fingertips' rubber coating tends to wear off onto  
 140 the objects and interfere with tracking.

141 *Sensors:* besides the torque and position sensing offered by the Sawyer, we equipped the robot with a  
 142 Robotiq FT 300 force-torque sensor at the wrist. Additional perception is guaranteed by surrounding  
 143 the robot with three Basler ace RGB cameras which give a complete view over the robot playground  
 144 (Figure S8).

145 *Playground:* the basket in front of the robot, also referred to as “playground”, is a laser-cut basket  
 146 with slanted sides to delimit the robot’s working area and to help with objects confinement. It has  
 147 a  $25\text{ cm} \times 25\text{ cm}$  bottom surface; the robot is constrained to moving its TCP inside a 20 cm-high  
 148 virtual cube on top of this surface to ensure safe operation.

### 149 B.1.1 Control Actions

150 While the robot’s 7 DoFs are natively controlled in joint space, we implement a Cartesian controller  
 151 to reduce the action space. We restrict the gripper to be oriented vertically, thus allowing only 4-  
 152 DoF motions (3D Cartesian and 1D rotation). This restriction is used in a number of prior works  
 153 studying vision-based manipulation [7, 8, 9]. A control action is fully specified by a 3D Cartesian  
 154 velocity  $v_x, v_y, v_z$ , and an angular velocity  $\omega_z$  around a vertical axis parallel to gravity. We use a  
 155 P-controller to compute the horizontal angular velocity components  $\omega_x$  and  $\omega_y$  that keep the gripper  
 156 oriented vertically, and combine it with the agent’s actions to create the command for our Cartesian  
 157 6D velocity controller. Finally, a directional velocity action for the grippers single degree of freedom  
 158 is added, yielding the actions summarized in Table S1.

159 At every environment step, after choosing an action, we then solve a constrained least-squares  
 160 problem to compute the joint velocities that best realize a target Cartesian 6D velocity of the  
 161 TCP [10, 11]. The null-space is controlled to bias the robot’s joint positions towards a nominal  
 162 configuration in the center of the joint limits. Constraints are specified to prevent the robot from  
 163 violating the joint position and velocity limits, as well as avoiding collisions between the robot and  
 164 the playground [12, 13]. The constrained least-squares problem is solved using an off-the-shelf QP  
 165 solver [14], and the computed joint velocities are forwarded to the robot’s proprietary joint velocity  
 166 controller.

## 167 B.2 Environment Observations

168 The robot, sensors and cameras provide various readings, which are collected at a fixed rate of 20 Hz  
 169 and merged into a single observation. Not all possible observation elements are used in all stages of  
 170 the system; most notably, the Cartesian object positions provided by the tracking system described  
 171 in Section B.3 are only used for computing rewards, for reset, and for the scripted baselines—the  
 172 learned agent cannot access this information.

| Component                   | Degrees of Freedom | Range           | Unit               |
|-----------------------------|--------------------|-----------------|--------------------|
| Cartesian translation       | 3                  | $[-0.07, 0.07]$ | m/s                |
| Cartesian rotation (z-axis) | 1                  | $[-1, 1]$       | rad/s              |
| Gripper                     | 1                  | $[-255, 255]$   | ticks <sup>4</sup> |

**Table S1: Ranges and units of the different components of the agent action.**

| Observation                   | Unit                  | Size                      | Obs. History | Observation Set |            |
|-------------------------------|-----------------------|---------------------------|--------------|-----------------|------------|
|                               |                       |                           |              | Full            | Evaluation |
| Joint angles                  | rad                   | 7                         | 3            | ✓               | ✓          |
| Joint velocities              | rad/s                 | 7                         | 3            | ✓               | ✓          |
| Joint torques                 | N m                   | 7                         | 3            | ✓               | ✓          |
| Wrist pose                    | m, quat.              | 7                         | 3            | ✓               | ✓          |
| Pinch pose                    | m, quat.              | 7                         | 3            | ✓               | ✓          |
| Finger angle                  | ticks                 | 1                         | 3            | ✓               | ✓          |
| Finger velocity               | ticks                 | 1                         | 3            | ✓               | ✓          |
| Grasp                         | discrete <sup>5</sup> | 1                         | 3            | ✓               | ✓          |
| Wrist force                   | N                     | 3                         | 3            | ✓               | ✓          |
| Wrist torque                  | N m                   | 3                         | 3            | ✓               | ✓          |
| Wrist velocity                | rad/s                 | 3                         | 3            | ✓               | ✓          |
| Front left camera             | RGB values            | $128 \times 128 \times 3$ | 1            | ✓               | ✓          |
| Front right camera            | RGB values            | $128 \times 128 \times 3$ | 1            | ✓               | ✓          |
| Back left camera              | RGB values            | $128 \times 128 \times 3$ | 1            | ✓               | ✓          |
| Object positions <sup>6</sup> | m                     | $3 \times 3$              | 3            | ✓               |            |
| Joint action <sup>7</sup>     | rad/s                 | 7                         | 2            | ✓               | ✓          |

**Table S2: Observations provided by the real-world robot setup.**

173 We distinguish between two observation sets.

- 174 • *Full*: contains all values provided by the real robot. Parts are used for environment resets,
- 175 reward computation, and scripted baselines.
- 176 • *Evaluation*: a subset of the full set, with tracker information removed.

177 In addition, each observation is stacked over several time steps. Observation stacking was chosen  
178 since the physical system is subject to actuation delays, and thus would not fulfil the requirements  
179 of an MDP without stacking. Camera observations are excluded from the observation stacking due  
180 to real-time and memory constraints.

181 The available observations, their units, and the places where each is used, are listed in [Table S2](#).  
182 Note that all of these sets denote *available* observations, and agents can choose to omit entries; for  
183 instance, the image observation from the back camera is omitted by our agent architecture to reduce  
184 inference time.

185 Furthermore, the Robotiq gripper used in our setup has a parallel mechanism that causes a non-linear  
186 relation between the motor encoder ticks used throughout this work, and the Cartesian distance  
187 between the fingertips. Since this relation can be hard to visualize intuitively, we present a number  
188 of poses that were used in [Figure S9](#).

<sup>4</sup>The gripper does not allow setting velocities in natural units, but a byte value that is mapped to a corresponding percentage of the maximum speed, which is nominally 150 mm/s.

<sup>5</sup>The actual values provided by the sensor are 1 for no grasp, 2 for an inward grasp, and 3 for an outward grasp that is not possible with non-hollow objects.

<sup>6</sup>Measured relative to the base of the robot.

<sup>7</sup>This contains the previous 7-DoF joint action sent to the robot, which is distinct from the 4-DoF Cartesian action selected by the agent, and reduces ambiguity in the state.

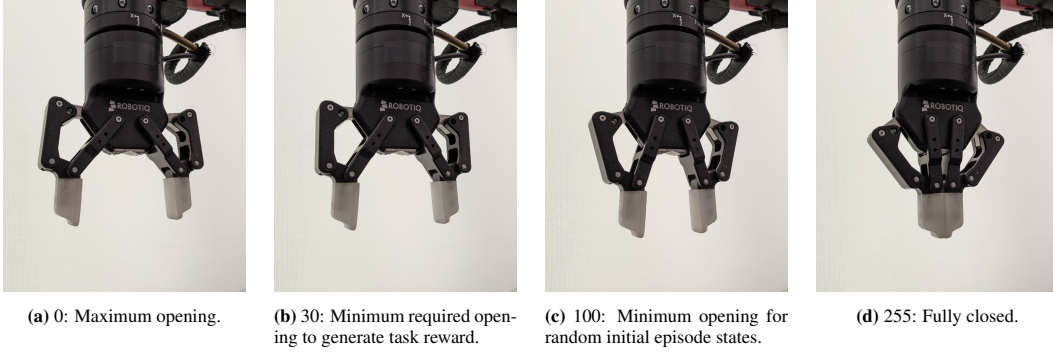

Figure S9: Overview of various relevant gripper positions.

### B.3 Object Position Estimation

Several components of our setup rely on the availability of a tracking system to determine the 3D position of the objects, relative to the robot. Specifically, this is required for the scripted baseline used in this work and described in detail in Section C.2, for computing per-timestep rewards (Section B.4), and for automatically resetting the environment in automated evaluations (Section B.4.2). We therefore implemented a color-based object position estimation algorithm that provides an estimate of the 3D centroids of the red, green and blue objects. Given the critical role of this component, we calibrate (both intrinsics and extrinsics [15]) and use all three cameras available in our robot setup. The position estimation algorithm works as follows:

1. Convert the RGB into YUV images: this conversion allows finer control over colors using the chrominance components UV and robustness over brightness variations through the luminance component Y.
2. Apply red, green and blue color masking using UV components. It is worth noting that we used the same ranges across all robot cells used in this work, while regularly applying white balancing.
3. For each color, find the largest contour and evaluate its centroid using image moments [16].
4. Estimate the 3D centroids  $\{[x_c, y_c, z_c]\}_{c \in \{r, g, b\}}$  of the objects in the robot reference frame through triangulation [15].

### B.4 Task Evaluation

The performance of an agent is tested on a number of trials – 200, unless specified otherwise. The initial state of the objects is randomized between episodes in the following way:

- Using a modified variant of the scripted controller (Section C.2), all objects are moved to random positions inside the working area.
- The robot’s TCP is moved to a random position inside the working volume, excluding the lowest 8 cm to avoid collisions with objects.
- The wrist joint is rotated to a random position within  $[-\frac{\pi}{2}, \frac{\pi}{2}]$ .
- The fingers are moved to a random opening angle within  $[0, 100]$  (i.e. open or half-open; see Figure S9 for a visualization).

Each trial lasts 20 seconds, or 400 steps at a control rate of 20 Hz. Trials are prematurely terminated when the wrist force sensor senses horizontal forces of greater than 2 N or a vertical force of greater than 2.5 N. In this case, an RL agent receives a discount of zero.

#### B.4.1 Reward Definition

We all can understand what a stacked pair of objects should look like, however it is surprisingly difficult to define for a large set of geometric shapes, for the purposes of automated evaluations. Here we formalize the definition of “stacking” used in the main paper.



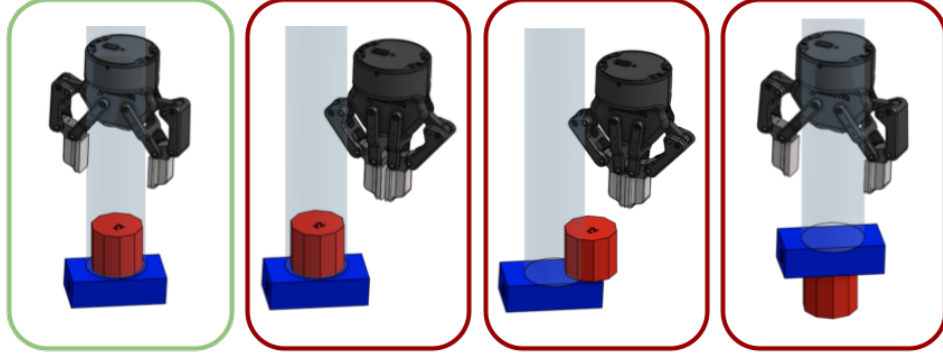

**Figure S10: Various success conditions.** From left to right: 1. Successful stack with gripper open and the top object in the cylinder region. 2. The objects are centered but the gripper is closed. 3. The top object is off-center, with its centroid outside the admissible cylinder. 4. The top object is below the cylinder region.

For objects to be considered “stacked”, the top object’s position (as estimated by the tracking system) must be inside a cylindrical volume of a 3 cm radius, starting 2.5 cm or higher above the bottom one, and the gripper must be fully opened. Specifically, for object centroids  $[x_{top}, y_{top}, z_{top}]$  and  $[x_{bottom}, y_{bottom}, z_{bottom}]$ , and for finger-opening angle  $f$ , we define the sparse, binary, stack reward:

$$r = \begin{cases} 1, & \text{if } (z_{top} - z_{bottom} > 0.025) \wedge (\|(x_{top}, y_{top}) - (x_{bottom}, y_{bottom})\| < 0.03) \wedge (f < 30) \\ 0, & \text{otherwise.} \end{cases} \quad (\text{S1})$$

The open-ended cylinder was chosen to accommodate objects of arbitrary sizes. For instance, the top (red) object of Triplet 3 has a length of 15 cm, so the centroid can be a considerable distance from the bottom object when standing on its long side. A visual depiction of different stacked pairs being considered successful (green) or failures (red) is given in Figure S10.

#### B.4.2 Automation for Unattended Learning and Evaluation

The training and evaluation process used in this work is largely automated. In fact, the experiments were continued throughout multiple COVID-19 lockdowns. In particular, the randomization procedure described above is fully automatic, with a modified version of the PID controller developed for the scripted baseline (Section C.2) being used to move objects. Note that the lack of object orientation provided by the tracker means that pose randomization is not deliberate. Instead, we rely on incidental rotation when objects are dropped, and run evaluations for at least 200 trials to reduce variance.

A pool of 10 identical robot cells is used for data collection. To guarantee comparability of results, evaluations are always performed on the same five cells, each of which is associated with one specific test triplet. Furthermore, tare is performed on the wrist force-torque sensor between episodes, in order to prevent drift. All cameras are white-balanced and their brightness adjusted to the same level, to counteract both daytime fluctuations in lighting, and differences between individual robot cells.

Evaluation requests are enqueued for each cell, and processed in order of arrival; thus, there is no closed training-evaluation loop, but training from any robot data always has to be offline to some degree. In the absence of new evaluation requests, old ones are automatically repeated in order to gather additional data and reduce variance. A number of consistency checks between episodes ensure that all sensors report data at the expected rates, and that actuators are operational—failing these checks would trigger the only required human interaction.

#### B.5 Simulation

Our simulation environment was implemented in the MuJoCo [17] physics simulator. Like the equivalent real robot environment, it contains a Sawyer arm with a Robotiq 2F-85 gripper mounted behind the playground, with three cameras attached to the basket.



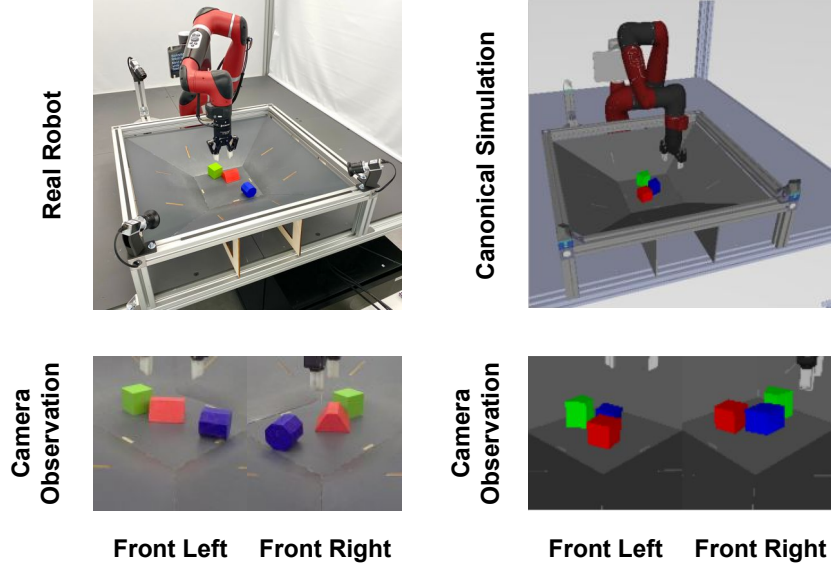

**Figure S11: Real and simulated environments.** Equivalent real and simulated environments with the camera observations used during training.

The simulation was designed to provide the same observations as the real robot, with the same ranges and shapes. A small number of observations were too dissimilar to be of use, notably the torques, and are thus omitted. For the full list of available observations in our simulated environment at different stages of training, see Table S5. Like the observations, the simulation exposes the same 4-DoF Cartesian actions as the real robot’s given in Table S1. It uses the same QP controller as described in Section B.1.1 to compute joint velocities from Cartesian velocities at 20 Hz. It was also designed to have similar appearance and dynamics to the real environment. However, as Figure S11 illustrates, the low-level appearance is noticeably different. Likewise, the physics differ in the way objects interact and slide off each other.

The evaluation protocol in simulation follows that of the real robot, with a few key differences.

1. We perform 1000 evaluation episodes per policy per Triplet<sup>8</sup>, rather than 200.
2. The entire 6-DoF pose of the objects is randomized, rather than only the position.
3. The sparse evaluation reward makes use of privileged information from the simulator, which isn’t available on the real system, specifically whether objects are directly in contact with each other. This allows us to have a wider admissible cylinder of 5 cm in which the top object may be placed, and eliminates the need to check the gripper’s opening angle.

$$r = \begin{cases} 0, & \begin{aligned} &\text{if } \|(x_{top}, y_{top}) - (x_{bottom}, y_{bottom})\| > 0.05 \\ &\text{if } (z_{top} - z_{bottom}) < 0.02 \\ &\text{if top object is not in contact with bottom object} \\ &\text{if top object is in contact with robot or basket} \end{aligned} \\ 1, & \text{otherwise.} \end{cases} \quad (S2)$$

### B.5.1 Shaped Reward

Our shaped reward, which we designed to use for training our state-based agent *in simulation* only, forms a curriculum leading to a successful stack. It is divided into five progressive stages: **reaching and grasping** the top object, **lifting** it more than 10 cm above the basket, **hovering** the top object over the bottom object, **stacking** it, and **leaving** the objects stacked by moving the gripper away from them. Each stage generates a reward in  $[0, 1]$ , and the highest-level stage to produce a reward

<sup>8</sup>When evaluating on the training object set we evaluate 2 episodes for 5000 triplets.

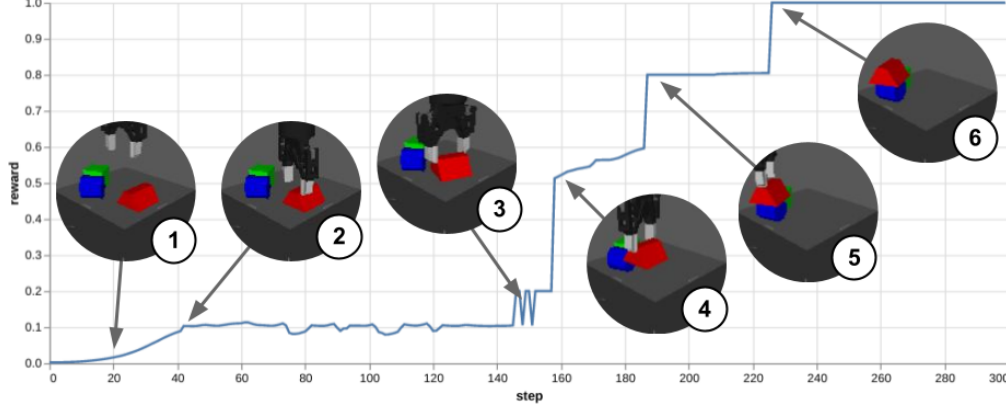

**Figure S12:** Reward trace for 300 steps of an episode. From left to right: 1. Approach during  $R_{reach}$  part of  $R_{grasp}$  stage. 2.  $R_{close\_gripper}$  component of  $R_{grasp}$  stage becomes active as the gripper is closed while realigning it to the graspable object faces. 3. Transition to  $R_{lift}$  stage as the object is slightly lifted. 4.  $R_{hover}$  increases as the object is moved closer to the target. 5. Objects are precisely enough placed to be considered stacked as per  $R_{stack}$ . 6. Gripper has moved far enough away to enter final  $R_{leave}$  stage.

279 of 0.1 or more is considered the “active” one.

$$r = \begin{cases} \frac{4+R_{leave}}{5}, & \text{if } R_{leave} > 0.1 \\ \frac{3+R_{stack}}{5}, & \text{if } (R_{stack} > 0.1) \wedge (R_{leave} \leq 0.1) \\ \frac{2+R_{hover}}{5}, & \text{if } (R_{hover} > 0.1) \wedge (R_{stack} \leq 0.1) \wedge (R_{leave} \leq 0.1) \\ \frac{1+R_{lift}}{5}, & \text{if } (R_{lift} > 0.1) \wedge (R_{hover} \leq 0.1) \wedge (R_{stack} \leq 0.1) \wedge (R_{leave} \leq 0.1) \\ \frac{R_{grasp}}{5}, & \text{otherwise.} \end{cases} \quad (S3)$$

280 Intuitively this amounts to an agent being rewarded incrementally for each of the stages that are  
 281 required to complete a stable stack. A detailed description of each of the stages and the definition of  
 282 the equivalent rewards can be found below. An example reward trace illustrating the different stages  
 283 is also shown in Figure S12.

284 We now describe the distinct stages of the shaped reward described above, all of which produce  
 285 rewards in  $[0, 1]$ . As laid out in Equation (S3), the stages are combined into a total reward that  
 286 consists of the “highest” of these stages that is currently generating a reward over 0.1, plus a fixed  
 287 amount for each “lower” stage.

288 Several of the stage rewards make use of a distance function  $D(a, b, s, t)$ , which is defined as the  
 289 tanh over the distance between  $a$  and  $b$ , which decays to 0.05 as the distance reaches  $s$ . If the  
 290 distance is below a tolerance of  $t$ , the maximum value of 1 is returned. This distance function is  
 291 illustrated in Figure S13.

$$D(a, b, s, t) = \begin{cases} 1, & \text{if } ||a - b|| < t \\ 1 - \tanh\left(||a - b|| \frac{\tanh^{-1}\sqrt{0.95}}{s}\right)^2, & \text{otherwise.} \end{cases} \quad (S4)$$

292 **Reaching and Grasping** The first stage  $R_{grasp}$  provides reward when the tool center point (TCP)  
 293 is moved close to the top object, with an additional bonus for closing the parallel gripper that is  
 294 given only when already very close to the object.

$$R_{grasp} = R_{reach} \cdot \begin{cases} 0.5 + \frac{R_{close\_gripper}}{2}, & \text{if } R_{reach} > 0.9 \\ 0.5, & \text{otherwise.} \end{cases} \quad (S5)$$

295 The reaching component  $R_{reach}$  is a shaped distance between the TCP position  
 296  $pos_{TCP} = (x_{TCP}, y_{TCP}, z_{TCP})$  and that of the top object  $pos_{top} = (x_{top}, y_{top}, z_{top})$ , de-  
 297 caying within 15 cm and with no tolerance. The positions are provided in meters with respect to the  
 298 robot frame of reference, centered around the arm’s base.

$$R_{reach} = D(pos_{TCP}, pos_{top}, 0.15, 0). \quad (S6)$$

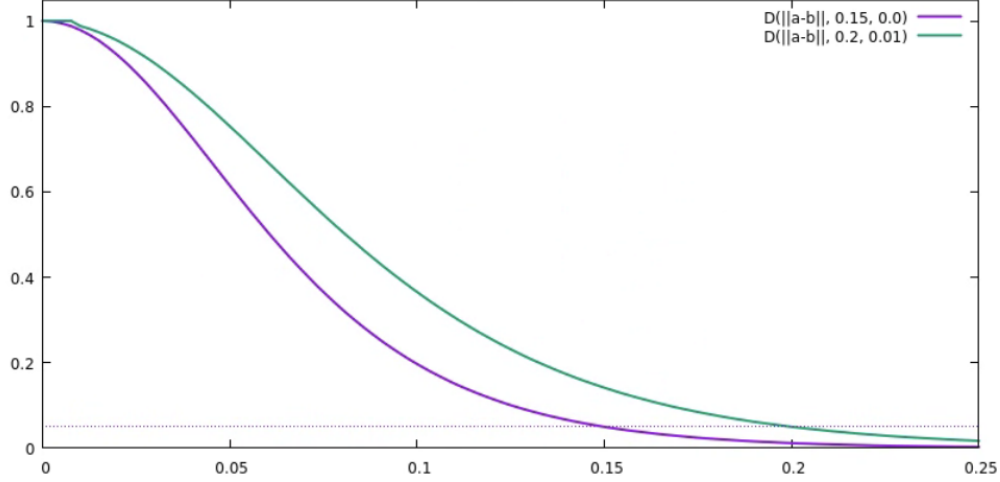

**Figure S13:** Examples of the distance function used in several reward terms, with the x-axis showing the distance between two entities  $a$  and  $b$ . Note how the value always decays to 0.05 (dashed line) as the distance reaches the shaping tolerance  $s$ .

299 The component  $R_{close\_gripper}$  in turn is maximal when the grasp sensor is triggered. If not, a smaller  
 300 shaped reward is given, which approaches its maximum as the gripper opening angle  $f$  reaches its  
 301 maximum closing angle of 255.

$$R_{close\_gripper} = \begin{cases} 1, & \text{if grasp sensor triggered} \\ \frac{D(f, 255, 255, 0)}{2}, & \text{otherwise} \end{cases} \quad (S7)$$

302 **Lifting** The lift stage  $R_{lift}$  also makes use of the grasp component  $R_{close\_gripper}$ , but multiplies it  
 303 with a shaped reward that linearly increases as the designated top object's centroid moves between  
 304 a minimum height of 5.5 cm and a maximum of 10 cm.

$$R_{lift} = R_{close\_gripper} \cdot R_{move\_TOP\_up} \quad (S8)$$

$$R_{move\_TOP\_up} = \begin{cases} 1, & \text{if } z_{top} > 0.1 \\ 0, & \text{if } z_{top} < 0.055 \\ \frac{z_{top} - 0.055}{0.1 - 0.055}, & \text{otherwise} \end{cases} \quad (S9)$$

305 where  $z_{top}$  is the height of the top object from the basket.

306 **Hovering** The hovering stage  $R_{hover}$  simply provides reward for the top object being close to a  
 307 position 4 cm above the bottom one. Maximum reward is given with a 1 cm tolerance around this  
 308 position to account for noise in the tracking system. Outside this tolerance, the reward decays within  
 309 20 cm.

$$R_{hover} = D(pos_{top}, pos_{bottom} + (0.0, 0.0, 0.04), 0.2, 0.01). \quad (S10)$$

310 **Stacking** The stacking stage  $R_{stack}$  is a sparse reward that is only non-zero when the red object's  
 311 horizontal position is within 3 cm of the blue one's, and its vertical position within 1 cm of the point  
 312 4 cm above the blue one. Note that this differs from the open volume in which the red object is  
 313 allowed to be (which is used for the real robot's evaluation in Equation (S1)).

$$R_{stack} = \begin{cases} 0, & \text{if } \|(x_{top}, y_{top}) - (x_{bottom}, y_{bottom})\| > 0.03 \\ \text{if } (z_{top} - z_{bottom} + 0.04) > 0.01 \\ 1, & \text{otherwise.} \end{cases} \quad (S11)$$

314 **Leaving** The final leaving stage  $R_{leave}$  is identical to the stacking stage  $R_{stack}$ , but multiplied by  
 315 a shaped term that rewards moving the TCP to a position 10 cm above the red object, thus forcing  
 316 the agent to let go of the object. Since it is not important whether that position is precisely reached,  
 317 maximum reward is given with a tolerance of 3 cm.

$$R_{leave} = R_{stack} D(z_{TCP}, z_{top} + 0.1, 0.05, 0.03). \quad (S12)$$

## 318 C Baselines

### 319 C.1 Human performance

320 As a rough indication of task difficulty, we collected a few demonstrations of the task in simulation  
 321 from human teleoperators. The demonstrations were collected by 4 individuals who were not part  
 322 of the research team. They used game pads to control the robot arm, and faced the same time limit  
 323 as was used for evaluation of learned or scripted agents. Unlike agents, teleoperators were given a  
 324 single camera view at a high resolution. Teleoperators recorded a total of 846 episodes (the number  
 325 varied from 141 to 331 per participant), with the object set randomly replaced every 10 episodes.

326 These demonstrations were not used to train any of the agents mentioned in the paper. Results are  
 327 summarized in [Table S3](#).

| Objects         | Success Rate | Reward | Episode Count |
|-----------------|--------------|--------|---------------|
| (Sim) Triplet 1 | 37%          | 23     | 204           |
| (Sim) Triplet 2 | 36%          | 16     | 160           |
| (Sim) Triplet 3 | 35%          | 24     | 159           |
| (Sim) Triplet 4 | 59%          | 39     | 133           |
| (Sim) Triplet 5 | 66%          | 47     | 190           |

**Table S3:** Average success rate and cumulative sparse reward for each of the test object sets, from human teleoperators.

### 328 C.2 Scripted Agent

329 The scripted baseline is a classical robotic control approach using a lot of prior knowledge, coded in a  
 330 finite-state-machine. It uses the same observations available to the agent, as well as the 3D positions  
 331 of the blue and red objects' centroids. In the real environment, the 3D positions of the objects  
 332 are obtained from a centroid estimation algorithm ([Section B.3](#)); in the simulated environment, the  
 333 positions are obtained directly from the simulator. The performance of our scripted behaviour is  
 334 meant to be used as a data point to understand how far a task-solver can get when ignoring relevant  
 335 information such as the objects' orientation and shapes.

336 The scripted baseline was implemented through the use of a finite-state machine (FSM) with 9  
 337 states and 12 unique transition functions. A state diagram representation of the FSM is shown in  
 338 [Figure S14](#). During normal execution, the FSM starts at the 0th state and continues through states  
 339 1-6 until the objects are stacked. If the objects are found to be stacked at any point during the  
 340 execution of the FSM, a transition to the final state 7 ("End") is made. If any of the states fail, the  
 341 FSM immediately transitions to the 8th state, which re-positions the tool-center-point (TCP) of the  
 342 robot and loops back to state 1. Note that states 0, 1, 5, and 8 do not implement transitions or failure  
 343 detection and are always executed until completion.

344 The description of each of the states in the FSM is given below:

- 345 0. Init: No-op state that initializes the FSM and immediately transitions to the next state. This  
 346 state always executes until completion;
- 347 1. Move open gripper to top object centroid: Opens the gripper and moves the TCP towards  
 348 the position of the red object. Executes a non-zero angular velocity if  $step > 100$ , zero  
 349 otherwise. Completes if the TCP is within a pre-defined threshold of the red object. This  
 350 state always executes until completion;

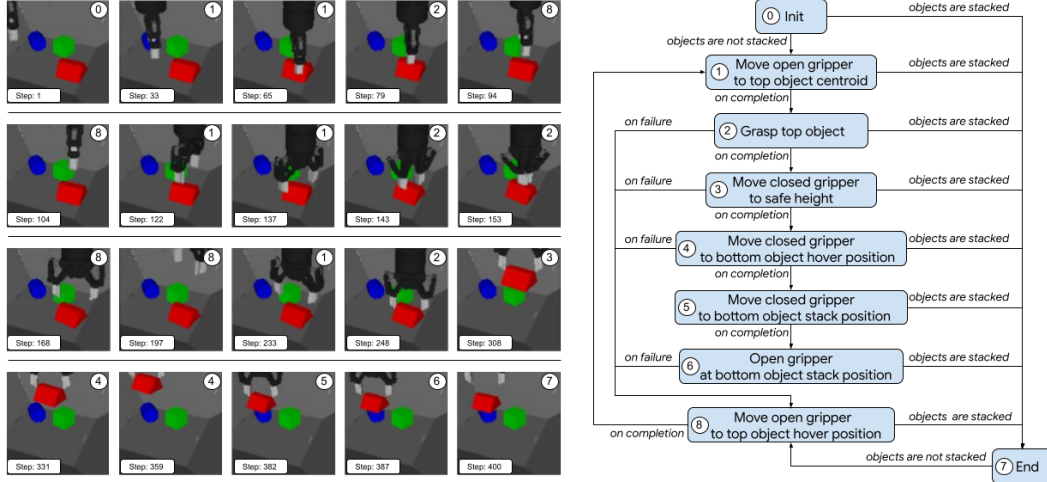

**Figure S14:** (Left) Example scripted baseline run for the test object set 1. Each figure shows the state ID on the top right, and the current step counter on the bottom left. (Right) State diagram for the finite-state machine used in the scripted baseline.

- 351 2. Grasp top object: Closes the gripper while maintaining the TCP position close to the red  
352 object. Executes a non-zero angular velocity if  $step > 100$ , zero otherwise. Completes if  
353 a grasp is detected based on readings from force reading. Fails if the gripper closes and no  
354 grasp is detected;
- 355 3. Move closed gripper to safe height: Moves the TCP up while maintaining the gripper  
356 closed. Completes if the TCP is above 20 cm. Fails if a grasp is not detected, or if the  
357 distance between the TCP and the red object becomes too large;
- 358 4. Move closed gripper to bottom object hover position: Moves the TCP to a point at an ab-  
359 solute height of 20 cm directly above the blue object while maintaining the gripper closed.  
360 Completes if the TCP is above the blue object. Fails if a grasp is not detected, or if the  
361 distance between the TCP and the red object becomes too large;
- 362 5. Move closed gripper to bottom object stack position: Moves the TCP to a point 3 cm above  
363 the bottom object while maintaining the gripper closed. Completes if the TCP is within a  
364 pre-defined threshold of this point. This state always executes until completion;
- 365 6. Open gripper at bottom object stack position: Opens the gripper while maintaining the  
366 TCP position 3 cm above the bottom object. Fails if the objects are not stacked after open-  
367 ing the gripper;
- 368 7. End: Opens and lifts the gripper to an absolute height of 30 cm. Final state. Fails if the  
369 objects are not stacked;
- 370 8. Move open gripper to top object hover position: Opens the gripper and moves the TCP to  
371 a point at an absolute height of 20 cm directly above the red object. Executes a non-zero  
372 angular velocity if  $step > 100$ , zero otherwise. Completes if the TCP is above the red  
373 object at a pre-defined height. This state always executes until completion and will result  
374 in different “random” grasp orientations.

375 Position control of the TCP is achieved through a low-gain P-controller on the error between the  
376 desired 3D Cartesian position and the current position of the TCP. The desired position of the TCP  
377 is computed on each state individually based on the predefined behaviour of each state and the  
378 measured position of the objects through our perception pipeline. The orientation of the wrist is  
379 only actively controlled during the execution of the 1, 2, and 8th states, which execute a random  
380 angular velocity about the vertical axis after the 100th step, or zero otherwise. The outputs of the  
381 P-controller are passed directly to the first 3-DoF of the action space exposed by the environment,  
382 while the angular velocity commands (4th DoF) are set to zero during states that do not actively  
383 control the orientation.

| Objects          | Success Rate | Reward |
|------------------|--------------|--------|
| (Sim) Triplet 1  | 35%          | 48     |
| (Sim) Triplet 2  | 30%          | 58     |
| (Sim) Triplet 3  | 27%          | 40     |
| (Sim) Triplet 4  | 66%          | 128    |
| (Sim) Triplet 5  | 67%          | 128    |
| (Real) Triplet 1 | 36%          | 54     |
| (Real) Triplet 2 | 23%          | 39     |
| (Real) Triplet 3 | 34%          | 49     |
| (Real) Triplet 4 | 85%          | 152    |
| (Real) Triplet 5 | 77%          | 143    |

**Table S4:** Scripted baseline performance success rate and average cumulative reward for each of the test object sets in the simulated and real environment.

| Observation / Reward | State-Based (Simulation)             | Vision-Based (Simulation)            | Vision-Based (Real)            |
|----------------------|--------------------------------------|--------------------------------------|--------------------------------|
| Joint angles         | ✓                                    | ✓                                    | ✓                              |
| Joint velocities     | ✓                                    |                                      | ✓                              |
| Joint torques        | ✓                                    |                                      |                                |
| Wrist pose           | ✓                                    | ✓                                    |                                |
| Pinch pose           | ✓                                    | ✓                                    | ✓                              |
| Finger angle         | ✓                                    | ✓                                    | ✓                              |
| Finger velocity      | ✓                                    |                                      | ✓                              |
| Grasp                | ✓                                    |                                      | ✓                              |
| Wrist force          | ✓                                    |                                      |                                |
| Wrist torque         | ✓                                    |                                      |                                |
| Wrist velocity       | ✓                                    |                                      |                                |
| Front left camera    |                                      | ✓                                    | ✓                              |
| Front right camera   |                                      | ✓                                    | ✓                              |
| Back left camera     |                                      |                                      |                                |
| Object positions     | ✓                                    |                                      |                                |
| Object pose          | ✓                                    |                                      |                                |
| Joint action         |                                      |                                      |                                |
| Reward               | Shaped (Simulation)<br>Equation (S3) | Sparse (Simulation)<br>Equation (S2) | Sparse (Real)<br>Equation (S1) |

**Table S5: Observations and rewards used at different training stages.** The state-based teacher is trained with privileged information in simulation, and is then distilled to a vision-based policy that has access to images and only proprioception observations that are realistic in simulation and can also be later used for zero-shot sim-to-real transfer. For this reason, we exclude velocity, force, and torque observations for distillation in simulation. For the one-step offline policy improvement, a new vision-based policy is trained from a real-world dataset. This improved policy now includes velocity observations, but excludes force and torque observations since they too noisy in the real system. We did not use the back camera in our experiments.

384 **Table S4** summarizes the average performance of the scripted approach on the test sets. Each test set  
385 was evaluated for 1000 episodes in simulation, and for at least 800 episodes in the real setup. The  
386 agent achieved a success rate of 43% on the training set over 10 000 episodes in simulation.

## 387 D Methods

### 388 D.1 Details on Training Expert policies from State Features in Simulation

389 As outlined in the [Section 4.1](#), the first step in our approach is to train a policy, in simulation, either  
390 specializing on each of the 5 *fixed triplets* for the *Skill Mastery* task, or a general one on the 1 092 727  
391 triplets that are possible with the 103 training objects for the *Skill Generalization* task. As discussed,  
392 we found training directly from state features  $s$  to be significantly faster than training from vision in  
393 this step and thus exposed the full simulation state—proprioceptive information from the robot and  
394 6-DoF pose information about the objects—to the agent. The complete list of observations available



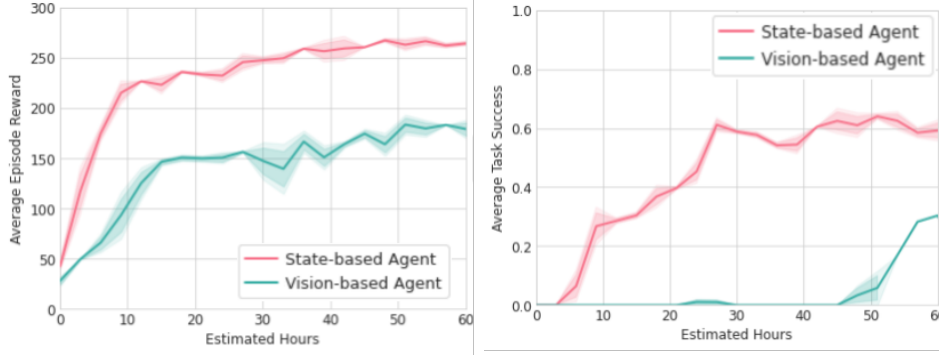

**Figure S15: State-based vs Vision-based MPO training.** Comparison of average reward (left) and average task success on the training set (right) for the Skill Generalization task when training from all available state information (State-based Agent) vs training from vision and proprioception (Vision-based Agent)

to the state-based policy can be found on Table S5. At this stage of the learning pipeline, we are mainly concerned with obtaining high-performing experts in a fast manner in simulation. Thus on top of access to full state information, we also use a shaped reward which is only available in simulation and enables fast learning. The shaped reward is described in Section B.5.1 and visualized in Figure S12. We provide a comparison between training with state features vs. training directly from vision in Figure S15. As is evident from the comparison training from vision results in a large slow-down in terms of training time.

As mentioned, any off-the-shelf RL algorithm could have been used for training our state-based policies. We opted to use MPO [18], which we found to lead to fast policy improvement while allowing for stable learning. MPO does not directly optimize the RL objective, but instead considers a KL regularized objective that is optimized with a policy iteration approach. Concretely, in iteration  $k$  we first learn a corresponding Q-function  $Q_{\phi}^{\pi_{k-1}}(s, a, y)$  for the policy from the last iteration (starting from a random policy  $\pi_0$  at  $k_0$ ), which can be learned from a replay buffer  $\mathcal{D}$  by finding the function that minimizes the squared temporal difference error:

$$\arg \min_{\phi} \mathbb{E}_{(s_t, a_t, s_{t+1}) \sim \mathcal{D}} \left[ \left( r(s_t) + \gamma \mathbb{E}_{a' \sim \pi_{k-1}(\cdot | s_{t+1}, y)} [Q_{\phi'}^{\pi_{k-1}}(s_{t+1}, a', y)] - Q_{\phi}^{\pi_{k-1}}(s_t, a_t, y) \right)^2 \right], \quad (\text{S13})$$

where  $\phi'$  are the parameters of a *target network* [19] that are replaced with the current parameters  $\phi$  for the Q-function every 200 optimization steps, and we use 20 samples from the policy to estimate the inner expectation. Instead of the single transition temporal difference error above, Abdolmaleki et al. [18] also considered a n-step temporal difference target calculated via the Retrace algorithm [20] and we use this target in our MPO implementation. This Q-function is then used to define the following KL constrained objective for policy optimization:

$$\begin{aligned} \mathcal{L}_{\text{MPO}}(q) &= \mathbb{E}_{s \sim \mathcal{D}} \left[ \mathbb{E}_{a \sim q} [Q^{\pi_{k-1}}(s, a, y)] \right], \\ \text{s.t. } \mathbb{E}_{\rho^{\pi_k}} [\text{D}_{\text{KL}}(q(\cdot | s, y), \pi_{\theta_e}(\cdot | s, y))] &< \epsilon_E, \end{aligned} \quad (\text{S14})$$

where  $\text{D}_{\text{KL}}$  denotes the KL divergence to the last policy, which restricts changes in the policy and induces stable learning. A solution to this problem can be found in closed form as  $q(a|s, y) \propto \pi_{k-1}(a|s, y) \exp(Q^{\pi_{k-1}}(s, a, y)/\alpha)$  which can be projected back to a parametric policy by finding the expert policy  $\pi_{\theta_e}$  as the maximizer

$$\begin{aligned} \pi_{\theta_e}(a|s, y) &= \arg \max_{\pi_{\theta_e}} \mathbb{E}_{s \sim \mathcal{D}} \left[ \mathbb{E}_{a \sim \pi_{k-1}} [\exp(Q^{\pi_{k-1}}(s, a, y)/\alpha) \log \pi_{\theta_e}(a|s, y)] \right], \\ \text{s.t. } \mathbb{E}_{\rho^{\pi_k}} [\text{D}_{\text{KL}}(\pi_{k-1}(\cdot | s, y), \pi_{\theta_e}(\cdot | s, y))] &< \epsilon_M, \end{aligned} \quad (\text{S15})$$

which corresponds to minimizing the KL between  $q$  and  $\pi_{\theta_e}$  and where  $\epsilon_M$  specifies an additional trust-region constraint placed on the policy (we set  $\pi_k$  for each iteration to  $\pi_{\theta_e}$  after 200 optimization

steps). We use a trust-region constraint that splits the influence on the mean and covariance for Gaussian policies as in Abdolmaleki et al. [21]. When using the hybrid space of continuous and discrete actions, we have a separate third trust-region constraint for the Bernoulli distribution, though we found that the discrete component didn't require a trust-region for stable learning. Optimization can be carried out via Monte-Carlo estimation of the objective using samples from the policy  $\pi_k$  to estimate the inner expectation, and samples from the replay buffer for the outer expectation. For a full description of the algorithmic details of solving this optimization problem we refer to Abdolmaleki et al. [18, 21].

## 429 D.2 Details on Interactive Imitation Learning for Sim-to-Real Transfer

After obtaining the experts via MPO, we distill the state-based experts into a single vision-based policy  $\pi_{\theta}^{\text{s2r}}$  via interactive imitation learning, as described in Section 4.2. In this step the  $\pi_{\theta}^{\text{s2r}}$  uses only a subset of the available observations (vision and proprioceptive readings but no information about object positions; see Table S5 for a complete list). The two key decisions made for distillation are: 1) We collect data using  $\pi_{\theta}^{\text{s2r}}$  while it is being trained. For this purpose we run a large number of "actor" processes (1000) in simulation with the domain randomized environment. These fetch the parameters  $\theta$  from the learner process at the beginning of every episode and send data to a replay buffer  $\mathcal{D}_{\text{s2r}}$ . 2) We train  $\pi_{\theta}^{\text{s2r}}$  based on feedback from the expert's on data sampled from the replay (this DAgger style training resulted in best performance as outlined in the experiments). We note that this is a purely supervised learning problem on a changing dataset; as is standard the influence of  $\pi_{\theta}^{\text{s2r}}$  on the dataset collection process is only implicit (i.e. we do not calculate the gradient of the sampling process for data-collection).

## 442 D.3 Details on Training Improved Policies from Real Data

When training improved policies from *real* data collected by executing  $\pi_{\theta}^{\text{s2r}}$  on the real robots, we use a slightly different subset of observations for the improved vision-based policy  $\pi_{\theta}^{\text{imp}}$  (now including velocity information; see Table S5 for a complete list). As described in Section 4.3, we use a filtered cloning loss of the data for this purpose, with filtering function  $f(s_t, a_t, \tau)$  where  $\tau$  corresponds to the trajectory data from the executed episode. When using BC-IMP, we simply set  $f(s_t, a_t, \tau) = r(s_T)$ , i.e. it is 1 if the binary sparse reward of the last step in the episode (at time  $T$ ) is 1, and 0 otherwise. This sparse reward information is readily available from the recorded episodes. For the exponential advantage filter (i.e. CRR-IMP), we use  $f(s_t, a_t, \tau) = \exp(A^{\pi_{\theta}^{\text{imp}}}(o(s_t), a_t)/\alpha)$ , in which case we need to learn an estimate of the advantage alongside the policy  $\pi_{\theta}^{\text{imp}}$ . We follow the implementation of CRR [22] and learn a distributional action-value function [23] from the same data that the policy is learned from by gradient descent on the objective:

$$\mathcal{L}_{\text{CRR-IMP}}^Q(\phi) = \mathbb{E}_{(s_t, a_t, s_{t+1}) \sim \mathcal{D}_{\text{real}}} \left[ D \left( r(s_t) + \gamma \mathbb{E}_{a' \sim \pi_{\theta}^{\text{imp}}(\cdot | o(s_{t+1}))} [Q_{\phi'}(o(s_{t+1}), a')], Q_{\phi}(o(s_t), a_t) \right) \right], \quad (\text{S16})$$

where  $D$  denotes the distributional Q-learning operator,  $\phi'$  denotes the parameters of a target network (that are swapped for  $\phi$  every 200 optimization steps) and where  $Q_{\phi}(o(s_t), a_t)$  now is parameterized as a categorical distribution with 101 categories representing equally spaced bins of values from  $[-150.0, 150.0]$ . We learn this Q-function alongside the policy, and use  $Q_{\phi'}$  to calculate policy improvement (i.e. the advantage used in the exponential filter is also fixed for 200 optimization steps at a time). We calculate the advantage  $A^{\pi_{\theta}^{\text{imp}}}(o(s_t), a_t)$  using a Monte-Carlo estimate of

$$A^{\pi_{\theta}^{\text{imp}}}(o(s_t), a_t) = Q_{\phi'}(o(s_t), a_t) - \mathbb{E}_{a' \sim \pi_{\theta}^{\text{imp}}(\cdot | o(s_t))} [Q_{\phi'}(o(s_t), a')]$$

454 where we estimate the expectation with 20 samples from  $\pi_{\theta}^{\text{imp}}(\cdot | o(s_t))$ .

## 455 E Experimental Details

### 456 E.1 Domain Randomization and Image Augmentation

457 As mentioned above, our strategy for solving the RGB-stacking tasks in the real world is simulation-  
458 to-reality transfer. It is therefore of paramount importance to ensure that both stages described above

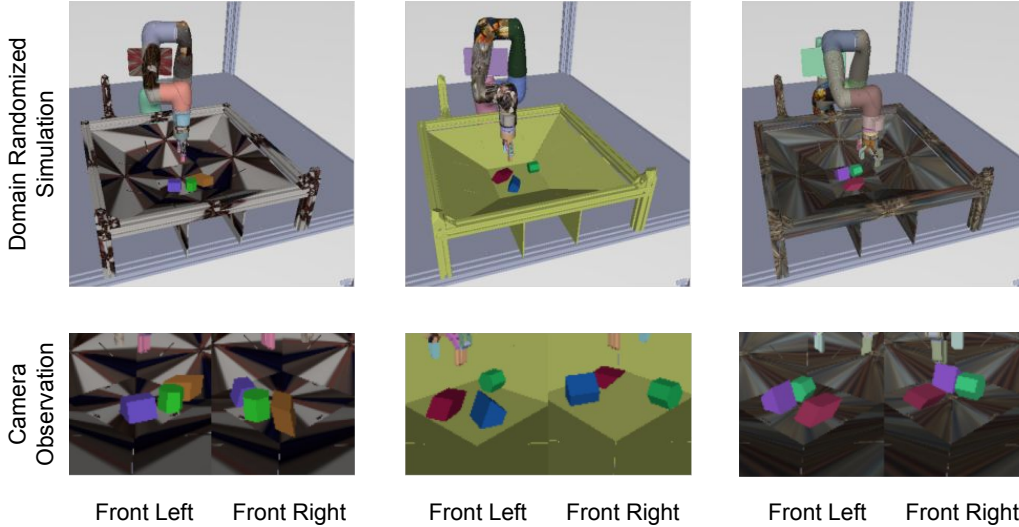

**Figure S16:** Visual illustration of our visual domain randomization with different sampling of the properties listed in Table S6 for the same set of objects - Triplet 2. Although all geometries can vary freely, the RGB-objects are restricted to a certain range “around” red, blue, and green to aid with the identification of these colors in the real world as well, as that is the way the vision-based agent knows which objects is the top, the bottom and the distractor.

will result in policies that are able to bridge the reality gap and perform well in our real-world setup. We do so by relying on (a) a simulation environment that is closely aligned to the real robot environment (in terms of camera poses, robot joint limits, etc.); and (b) a sufficient amount of domain randomization [24, 25] and visual data augmentation [26]. These ensure that the simulation-trained policies can successfully deal with the domain gap that still exists between the simulated and the real environments, and the increased stochasticity of the real world. Although we did consider learned adaptation methods as used in prior work [27, 28, 29] like using domain-adversarial losses [30, 31] and randomized-to-canonical networks [32], preliminary results did not seem to provide clear benefits on top of domain randomization and data augmentation.

### E.1.1 Domain Randomization

Domain Randomization (DR) has been shown to be a simple and powerful method to achieve generalization of simulation-trained policies to the real world for robotic learning problems [33, 24, 27, 34]. In our simulated environment we randomized a number of physical properties (e.g. mass, friction, damping, armature) for all agents, as well as the delay of executing their actions on the environment. We also randomized a number of visual properties (e.g. object colors, object textures, camera poses, lighting) for our vision-based agents at the distillation phase. In our randomized environments we uniformly sample, from pre-defined ranges, colors and textures for all geometries in our simulator, as well as lighting, and camera poses to create a large visual diversity. Action execution was randomly delayed 0, 1 or 2 timesteps, the equivalent of 0, 50 or 100 ms. Most physics properties did not require any particular tuning and are perturbed uniformly within  $\pm 10\%$  of their default values in the non-randomized version of our environment. The only exceptions are the ranges for the tangential, torsional, and rolling friction of the gripper, which were tuned carefully to prevent unrealistic grasping behaviours, e.g. grasping and lifting an object by a corner. The ranges for these were determined by teleoperating the simulated robot with different friction values. A list of all properties randomized, along with the range these were uniformly sampled from, can be found on Table S6. A few samples illustrating our object color and texture randomization can be seen in Figure S16. Note that MuJoCo multiplies the RGBA values if both *texture* and *rgba* properties were set, which results in undesirably dark appearance. Thus, for each geom, we alternate sampling textures or colors. Our RGB-objects were treated differently in order to maintain their basic color, as the task is defined based on the color theme of the objects. Firstly, they are never assigned a texture.

| Property                       | Range                                                       |
|--------------------------------|-------------------------------------------------------------|
| RGB                            | $[(128, 128, 128), (255, 255, 255)]$ RGB                    |
| Texture                        | set of 117 textures                                         |
| Red object color               | $[(-35, 0.5, 0.5), (35, 1, 1)]$ HSV                         |
| Green object color             | $[(95, 0.5, 0.5), (165, 1, 1)]$ HSV                         |
| Blue object color              | $[(200, 0.5, 0.5), (270, 1, 1)]$ HSV                        |
| Ambient light color            | $(0.3, 0.3, 0.3) \cdot (1 \pm 0.1)$ RGB                     |
| Diffuse light color            | $(0.6, 0.6, 0.6) \cdot (1 \pm 0.1)$ RGB                     |
| Camera front left position     | $(1, -0.395, 0.253) \cdot (1 \pm 0.1)$ m                    |
| Camera front left Euler        | $(1.142, 0.004, 0.783) \cdot (1 \pm 0.05)$ rad              |
| Camera front right position    | $(0.967, 0.381, 0.261) \cdot (1 \pm 0.1)$ m                 |
| Camera front right Euler       | $(1.088, 0.001, 2.362) \cdot (1 \pm 0.05)$ rad              |
| Camera field of view           | $[30, 40]$                                                  |
| Gripper friction coefficient   | $[(0.3, 0.1, 0.05), (0.6, 0.1, 0.005)]$                     |
| Hand friction coefficient      | $(1.0, 0.005, 0.0001) \cdot (1 \pm 0.1)$                    |
| Arm friction coefficient       | $(0.1, 0.1, 0.0001) \cdot (1 \pm 0.1)$                      |
| Basket friction coefficient    | $(1.0, 0.001, 0.001) \cdot (1 \pm 0.1)$                     |
| Objects friction coefficient   | $(1.0, 0.005, 0.0001) \cdot (1 \pm 0.1)$                    |
| Objects mass                   | $0.201 \cdot (1 \pm 0.1)$ kg                                |
| Arm joint armature             | $1.0 \cdot (1 \pm 0.1)$ kg m <sup>2</sup>                   |
| Hand driver joint armature     | $0.1 \cdot (1 \pm 0.1)$ kg m <sup>2</sup>                   |
| Arm joint damping              | $0.1 \cdot (1 \pm 0.1)$ N s/m                               |
| Hand driver joint damping      | $0.2 \cdot (1 \pm 0.1)$ N s/m                               |
| Hand spring link joint damping | $0.00125 \cdot (1 \pm 0.1)$ N s/m                           |
| Arm joint friction loss        | $0.3 \cdot (1 \pm 0.1)$ kg/(m <sup>2</sup> s <sup>2</sup> ) |
| Actuator gear                  | $(1, 0, 0, 0, 0) \cdot (1 \pm 0.1)$                         |
| Action delay                   | $[0, 2]$ timesteps                                          |

**Table S6: Domain randomization properties that are randomized in simulation and their ranges.** These properties were sampled uniformly at the beginning of every episode.

| Property                              | Range                           |
|---------------------------------------|---------------------------------|
| Brightness                            | $[-^{32}/_{255}, ^{32}/_{255}]$ |
| Hue                                   | $[-^{1}/_{24}, ^{1}/_{24}]$     |
| Saturation                            | $[0.5, 1.5]$                    |
| Contrast                              | $[0.5, 1.5]$                    |
| Translation (horizontal and vertical) | $[-4, 4]$ pixels                |

**Table S7: Image augmentation properties that are randomized and their ranges.** We sample random offsets from these ranges and apply the same random offsets to the entire sampled trajectory subsequence. We resample the offsets for each subsequence in the batch. That is, the random augmentations are consistent across time, but not across the batch.

Secondly, the hue range of each object is predefined in a way that maintains the color theme, and for each RGB-object we sample the color in HSV space.

## E.1.2 Image Augmentation

In order to further increase the diversity of the data and the zero-shot real-world performance of our simulation-only trained agents, we applied a number of image transformations to our visual observations on top of domain randomization. In addition, we applied the same image transformations when directly training from real-world data (e.g. for policy improvement). Unlike domain randomization, image augmentation is applied directly on image observations, so it is applicable to images from both simulated data and real-world data.

The following transformations are applied for image augmentation: random brightness, random hue, random saturation, random contrast, and random translation. These transformations are applied sequentially in that order. The random translations use bilinear interpolation and “reflect” fill mode (i.e. the input is extended by reflecting about the edge of the last pixel). For temporal consistency,

we sample the random augmentations and apply the same random offsets for all images within a trajectory subsequence. A list of the image augmentation properties, along with the ranges these were uniformly sampled from, can be found on [Table S7](#). We chose these ranges qualitatively without any tuning for evaluation success. For the random perturbations of the hue, we chose ranges small enough so that the red, green, and blue objects stay reasonably close to their respective colors. A few samples illustrating the effect of image augmentation can be seen in [Figure S18](#) for images from the real robots, [Figure S19](#) for canonical images from simulation, and [Figure S20](#) for domain-randomized images from simulation.

## E.2 Additional Network Architecture Details

The inputs to the networks are preprocessed in the same way for all the networks. The image observations are normalized to  $[0, 1]$ , whereas the non-image observations are flattened and concatenated into a single vector. The actions are normalized to  $[-1, 1]$ . The networks operate with normalized actions, i.e. critic networks processes normalized actions as inputs, and actor networks output action distributions in the normalized space. The agent scales back the actions to the original space when executing them in the environment.

In both the state-based and vision-based agents, we use an input normalization layer for the non-image observations. This input normalization layer consists of a linear layer, layer norm layer, and a tanh non-linearity. The size of the input normalizer refers to the number of units of the linear layer.

We use an output distribution layer for the output of the actor networks. The output distribution layer for the actor network outputs an independent joint distribution of multivariate normal (MVN) distribution with diagonal variance for the continuous action dimensions, and a Bernoulli distribution for the binary action dimension. The mean of the MVN is the output of a linear layer and the diagonal standard deviation is the output of a fully-connected layer with softplus non-linearity plus a bias of  $\sigma_{\min}$ . This distribution is not constrained to output normalized actions in  $[-1, 1]$ ; instead, we clip samples from this distribution depending on the context. The logits vector of the Bernoulli distribution is the output of a linear layer with output size 2. This distribution is scaled accordingly to output normalized actions in  $\{-1, 1\}$ .

**State-based agents.** The actor network consists of an input normalization layer, MLP, and output distribution layer. The critic network starts with an input normalization layer for the observations and clipping of the actions to  $[-1, 1]$ , then both streams are concatenated, and followed by an MLP and a linear layer with 1 output. These MLPs use exponential linear unit (ELU) activations. See [Table S8](#) for a full list of network architecture hyperparameters used for the state-based agents.

**Vision-based agents.** The actor network consists of an observation encoder, MLP, Transformer, another MLP, and output distribution layer. When using a critic (i.e. in CRR), the critic network starts with an observation encoder for the observations and clipping of the actions to  $[-1, 1]$ , then both streams are concatenated, and followed by an MLP and discrete-valued output distribution layer.

The actor and critic networks use the same architecture for their observation encoders, but their parameters are not shared. The observation encoder consists of two parallel streams—a ResNet stack for the image observations and an MLP with a final activation for the proprioception observations—and the outputs are merged by concatenation. The ResNet stack consists of a pair of ResNet encoders (one for each of the two images), activation, flattening and concatenation (of encodings from both images), and MLP with a final activation. Each ResNet encoder consists of 3 ResNet group modules. Each group module first applies a convolution followed by downsampling with a max-pooling layer, and then applies residual blocks modules twice. Each residual block consists of 2 convolution layers interleaved with non-linear activations.

The output distribution layer for the critic network outputs a discrete-valued distribution with support  $[v_{\min}, v_{\max}]$  that is uniformly spaced among  $n_{\text{atoms}}$  atoms or bins. The logits vector of this distribution is the output of a linear layer with output size  $n_{\text{atoms}}$ .

See [Table S9](#) for a full list of network architecture hyperparameters used for the vision-based agents. We found in preliminary experiments that having each image processed by a ResNet encoder led to better sim-to-real transfer performance compared to stacking the two images along the channel dimension and processing this stacked image with a single ResNet encoder. We also found that

| Hyperparameter                   | Value                |
|----------------------------------|----------------------|
| actor network                    |                      |
| input normalizer size            | 512                  |
| MLP sizes                        | (512, 512, 256, 256) |
| MVN distribution $\sigma_{\min}$ | $10^{-4}$            |
| activations                      | ELU                  |
| critic network                   |                      |
| input normalizer size            | 512                  |
| MLP sizes                        | (512, 512, 256)      |
| activations                      | ELU                  |

**Table S8: Network Architecture Hyperparameters for State-Based Agents.**

| Hyperparameter                                                      | Value                      |
|---------------------------------------------------------------------|----------------------------|
| image observation encoder (actor and critic)                        |                            |
| individual ResNet per image?                                        | yes                        |
| share parameters for the ResNets of both images?                    | yes                        |
| ResNet number of channels for each group                            | (64, 128, 256)             |
| ResNet number of blocks per group                                   | 2                          |
| ResNet convolution kernel size                                      | $3 \times 3$               |
| ResNet max-pooling size                                             | $3 \times 3$               |
| ResNet max-pooling stride                                           | 2                          |
| post-ResNet MLP sizes                                               | (256)                      |
| activations                                                         | ReLU                       |
| proprioception observation encoder (actor and critic)               |                            |
| input normalizer size                                               | 256                        |
| MLP sizes                                                           | (256)                      |
| activations                                                         | ReLU                       |
| actor network (after the observation encoder)                       |                            |
| pre-Transformer MLP sizes                                           | (512, 512)                 |
| Transformer number of heads                                         | 4                          |
| Transformer number of layers                                        | 1                          |
| Transformer value size                                              | 64                         |
| Transformer memory size                                             | 8                          |
| post-Transformer MLP sizes                                          | (256, 256)                 |
| —MLP sizes for ablation without Transformer                         | (1024, 512, 512, 256, 256) |
| MVN distribution $\sigma_{\min}$                                    | $10^{-4}$                  |
| activations                                                         | ELU                        |
| critic network (after the observation encoder)                      |                            |
| MLP sizes                                                           | (512, 512, 256)            |
| discrete-valued distribution number of atoms $n_{\text{atoms}}$     | 101                        |
| discrete-valued distribution range of values $[v_{\min}, v_{\max}]$ | $[-150.0, 150.0]$          |
| activations                                                         | ELU                        |

**Table S9: Network Architecture Hyperparameters for Vision-Based Agents.** The critic hyperparameters are only applicable to the methods that use a critic, i.e. CRR. Although the actor and critic networks use the same observation encoder *architecture*, their parameters are not shared.



555 sharing the parameters for the ResNets of both images led to even better transfer performance. This  
 556 parameter sharing also has an additional advantage of computational speedups (this can be achieved  
 557 by applying the ResNet in a single pass to both images concatenated along the batch dimension).  
 558 Note that although the observation encoders use rectified linear unit (ReLU) activations throughout,  
 559 the subsequent MLPs use ELU activations.

560 **Transformer Architecture.** While image augmentation and domain randomization helps with  
 561 bridging visual and physics domain gap, the gap of transition dynamics remains. A potential ap-  
 562 proach is to give agents access to temporal information, which encourages them to “reason” about  
 563 the transition dynamics. It has been shown in prior work on simulation-to-reality transfer [34], that  
 564 doing so can bridge the reality gap further, and might even enable the agents to be performing sys-  
 565 tem identification that can help with transfer in previously unseen environments. The Transformer  
 566 architecture has been widely adopted for natural language processing [35, 36] as well as for com-  
 567 puter vision [37]. However its application to control problems remains limited. Thereby we explore  
 568 the Transformer model, which demonstrated huge power of sequence based data processing with  
 569 attention mechanism, to encode temporal information. In this work, we adapted to the Transformer-  
 570 XL [36]. The transformer network has stacked self-attention module that apply to the input sequence  
 571 repeatedly. The transformer module consists of 1) a multi-head attention submodule followed by 2)  
 572 a multi-layer perceptron network.

573 The transformer torso takes encoded observations as input. The multi-head attention module applies  
 574 scaled dot-production attention for every timestep:

$$\text{Attention}(Q, K, V) = \text{softmax} \left( \frac{QK^T}{\sqrt{d_k}} \right) V \quad (\text{S17})$$

575 In addition to perform a single attention operation, it is beneficial to project  $Q, K, V$   $h$  times with  
 576 learned linear projections respectively, where  $h$  is number of heads:

$$\text{MultiHeadAttention}(Q, K, V) = \text{Concat}(\text{head}_1, \dots, \text{head}_h)W^o \quad (\text{S18})$$

$$\text{head}_i = \text{Attention}(QW_i^Q, KW_i^K, VW_i^V) \quad (\text{S19})$$

577 Following the multi-head attention module, a residual connection and layer normalization are ap-  
 578 plied. To leverage the order of the sequence, a positional-encoding layer is added to the input  
 579 embeddings. A fixed positional encoding using sine and cosine functions of various frequencies are  
 580 used in this work:

$$\text{SelfAttention}(Q, K, V) = \text{LayerNorm}(\text{MultiHeadAttention}(Q, K, V) + \text{PositionalEncoding}(V)) \quad (\text{S20})$$

581 On top of the self-attention layer, a fully-connected feed-forward network is applied to the output of  
 582 each timestep separately. The MLP consists of two linear layers with a ReLU activation in between.

### 583 E.3 Additional Training Details

584 We use a trust-region constraint for the policy update in MPO and CRR. Similarly to Abdolmaleki  
 585 et al. [18], the mean and standard deviation of the multivariate normal (MVN) of the actor distribu-  
 586 tion have separate trust-region constraints. However, we do not use a trust-region constraint for the  
 587 Bernoulli distribution component as we found it was not necessary for stable learning.

588 We use different learning rates for optimizing the actor, critic, and dual variables. We anneal the  
 589 learning rates for the actor and the critic, following an exponential decay schedule denoted as  
 590  $\text{range}(i_{\text{start}}, i_{\text{end}}, i_{\text{step}})$ , where  $i_{\text{start}}$  and  $i_{\text{end}}$  indicate the gradient step iteration at which the annealing  
 591 starts and ends, respectively, and  $i_{\text{step}}$  indicates the interval at which the learning rate is multiplied  
 592 by the decay factor.

593 See Table S10 and Table S11 for a full list of training hyperparameters used for state-based and  
 594 vision-based agents, respectively.

### 595 E.4 Detailed Real-Robot Results

596 In Table 2 and Table 3 we provide, for each setting, averages of multiple runs. These are 4 runs for  
 597 sim-trained distilled agents: 2 seeds for each of the 2 state-based teacher policies we distilled these

| Hyperparameter                                       | Value                           |
|------------------------------------------------------|---------------------------------|
| <b>MPO</b>                                           |                                 |
| discount factor $\gamma$                             | 0.99                            |
| actions sampled per state                            | 20                              |
| KL constraint $\epsilon_E$ on non-parametric policy  | 0.1                             |
| trust-region $\epsilon_M$ on policy (MVN mean)       | $5 \times 10^{-3}$              |
| trust-region $\epsilon_M$ on policy (MVN covariance) | $1 \times 10^{-4}$              |
| trust-region $\epsilon_M$ on policy (Bernoulli)      | none                            |
| update period for target networks                    | 200                             |
| <b>General</b>                                       |                                 |
| batch size                                           | 512                             |
| trajectory length                                    | 10                              |
| environment frames per gradient step                 | 250                             |
| replay buffer size                                   | $2 \times 10^6$                 |
| optimizer                                            | Adam [38]                       |
| actor initial learning rate                          | $5 \times 10^{-5}$              |
| actor learning rate decay factor                     | 0.9                             |
| actor learning rate decay schedule                   | range(1000000, 5000000, 300000) |
| critic initial learning rate                         | $1 \times 10^{-4}$              |
| critic learning rate decay factor                    | 0.9                             |
| critic learning rate decay schedule                  | range(1000000, 5000000, 300000) |
| dual learning rate                                   | $1 \times 10^{-2}$              |

**Table S10: Hyperparameters for Training State-Based Agents.**

| Hyperparameter                                       | Value                                                                                                           |
|------------------------------------------------------|-----------------------------------------------------------------------------------------------------------------|
| <b>ILL (DAgger) and BC</b>                           |                                                                                                                 |
| loss                                                 | negative log-likelihood                                                                                         |
| —loss for ablation using MSE loss                    | mean squared error                                                                                              |
| <b>CRR</b>                                           |                                                                                                                 |
| discount factor $\gamma$                             | 0.99                                                                                                            |
| actions sampled per state                            | 20                                                                                                              |
| KL constraint $\epsilon_E$ on non-parametric policy  | 0.1                                                                                                             |
| trust-region $\epsilon_M$ on policy (MVN mean)       | 0.1                                                                                                             |
| trust-region $\epsilon_M$ on policy (MVN covariance) | 0.1                                                                                                             |
| trust-region $\epsilon_M$ on policy (Bernoulli)      | none                                                                                                            |
| update period for target networks                    | 200                                                                                                             |
| <b>General</b>                                       |                                                                                                                 |
| batch size                                           | 64                                                                                                              |
| trajectory length                                    | 10                                                                                                              |
| environment frames per gradient step (online)        | 250                                                                                                             |
| replay buffer size (online)                          | $1 \times 10^5$                                                                                                 |
| dataset size (offline)                               | 85 213 episodes, 58 979 successful (Skill Mastery)<br>38 446 episodes, 14 381 successful (Skill Generalization) |
| optimizer                                            | Adam [38]                                                                                                       |
| actor initial learning rate                          | $1 \times 10^{-4}$                                                                                              |
| actor learning rate decay factor                     | 0.9                                                                                                             |
| actor learning rate decay schedule                   | range(25000, 1000000, 25000) (Skill Mastery)<br>range(100000, 1000000, 30000) (Skill Generalization)            |
| critic initial learning rate                         | $2 \times 10^{-4}$                                                                                              |
| critic learning rate decay factor                    | 0.9                                                                                                             |
| critic learning rate decay schedule                  | range(25000, 1000000, 25000)                                                                                    |
| dual learning rate                                   | $1 \times 10^{-2}$                                                                                              |

**Table S11: Hyperparameters for Training Vision-Based Agents.** The critic hyperparameters are only applicable to the methods that use a critic, i.e. CRR. We found that CRR doesn't need a tight trust-region for stable learning, so we chose a loose constraint of 0.1 without further tuning. The number of environment frames per gradient step and replay buffer size are only applicable in the online setting, which uses the simulated environment. The dataset size is only applicable in the offline setting, and the dataset consists of real-world episodes collected on the robots. The dataset for Skill Mastery only has the test triplets and the dataset for Skill Generalization only has the training objects.

| Method                  | Run                | Simulation Success |              |           |           |           |           |           | Real-Robot Success |           |           |           |           |           |  |
|-------------------------|--------------------|--------------------|--------------|-----------|-----------|-----------|-----------|-----------|--------------------|-----------|-----------|-----------|-----------|-----------|--|
|                         |                    | Training Objects   | Triplet Avg. | Triplet 1 | Triplet 2 | Triplet 3 | Triplet 4 | Triplet 5 | Triplet Avg.       | Triplet 1 | Triplet 2 | Triplet 3 | Triplet 4 | Triplet 5 |  |
| Skill Mastery           |                    |                    |              |           |           |           |           |           |                    |           |           |           |           |           |  |
| ILL-s2r                 | Teacher 1 - Seed 1 | N/A                | 75.1%        | 80.6%     | 50.7%     | 82.1%     | 74.9%     | 87.2%     | 68.1%              | 74.5%     | 49.0%     | 59.5%     | 87.0%     | 70.5%     |  |
| ILL-s2r                 | Teacher 2 - Seed 1 | N/A                | 73.3%        | 72.3%     | 49.1%     | 82.6%     | 75.7%     | 86.7%     | 73.7%              | 78.0%     | 64.0%     | 69.5%     | 86.0%     | 71.0%     |  |
| ILL-s2r                 | Teacher 1 - Seed 2 | N/A                | 74.7%        | 77.1%     | 54.4%     | 81.2%     | 74.5%     | 86.6%     | 66.1%              | 67.5%     | 49.0%     | 57.5%     | 82.0%     | 74.5%     |  |
| ILL-s2r                 | Teacher 2 - Seed 2 | N/A                | 73.7%        | 74.2%     | 51.0%     | 82.6%     | 74.4%     | 86.2%     | 63.7%              | 71.0%     | 33.0%     | 57.5%     | 85.5%     | 71.5%     |  |
| No Transformer          | Teacher 1 - Seed 1 | N/A                | 74.3%        | 74.9%     | 52.9%     | 82.6%     | 73.6%     | 87.5%     | 72.8%              | 73.5%     | 52.5%     | 65.5%     | 86.5%     | 86.0%     |  |
| No Transformer          | Teacher 2 - Seed 1 | N/A                | 72.5%        | 70.4%     | 51.5%     | 81.3%     | 73.2%     | 86.2%     | 66.6%              | 72.5%     | 40.5%     | 57.0%     | 83.5%     | 79.5%     |  |
| No Transformer          | Teacher 1 - Seed 2 | N/A                | 73.4%        | 78.5%     | 48.6%     | 80.9%     | 73.0%     | 85.9%     | 70.2%              | 72.5%     | 51.0%     | 64.0%     | 86.5%     | 77.0%     |  |
| No Transformer          | Teacher 2 - Seed 2 | N/A                | 73.1%        | 76.3%     | 48.8%     | 82.1%     | 72.2%     | 86.0%     | 67.6%              | 69.5%     | 38.0%     | 58.0%     | 87.5%     | 85.0%     |  |
| No image augmentation   | Teacher 1 - Seed 1 | N/A                | 74.1%        | 79.4%     | 50.2%     | 81.4%     | 73.3%     | 86.1%     | 66.6%              | 77.5%     | 44.0%     | 69.5%     | 81.0%     | 61.0%     |  |
| No image augmentation   | Teacher 2 - Seed 1 | N/A                | 71.4%        | 76.5%     | 47.8%     | 81.6%     | 65.0%     | 86.2%     | 60.1%              | 67.5%     | 32.0%     | 44.5%     | 86.0%     | 70.5%     |  |
| No image augmentation   | Teacher 1 - Seed 2 | N/A                | 74.1%        | 74.4%     | 51.0%     | 82.4%     | 72.9%     | 89.6%     | 70.3%              | 78.0%     | 52.0%     | 61.5%     | 90.0%     | 70.0%     |  |
| No image augmentation   | Teacher 2 - Seed 2 | N/A                | 71.6%        | 76.2%     | 45.8%     | 80.6%     | 70.2%     | 85.1%     | 56.9%              | 63.0%     | 26.5%     | 48.5%     | 79.0%     | 67.5%     |  |
| No action delay         | Teacher 1 - Seed 1 | N/A                | 74.5%        | 79.9%     | 50.6%     | 83.9%     | 72.8%     | 85.3%     | 71.1%              | 74.5%     | 52.5%     | 71.5%     | 83.5%     | 73.5%     |  |
| No action delay         | Teacher 2 - Seed 1 | N/A                | 72.1%        | 75.2%     | 47.8%     | 81.3%     | 70.7%     | 85.3%     | 67.2%              | 73.0%     | 45.5%     | 56.5%     | 89.5%     | 71.5%     |  |
| No action delay         | Teacher 1 - Seed 2 | N/A                | 74.0%        | 77.5%     | 51.3%     | 83.6%     | 73.7%     | 84.1%     | 68.9%              | 75.0%     | 43.5%     | 69.5%     | 80.5%     | 76.0%     |  |
| No action delay         | Teacher 2 - Seed 2 | N/A                | 73.3%        | 74.8%     | 52.3%     | 82.6%     | 71.3%     | 85.4%     | 67.6%              | 66.5%     | 57.5%     | 58.5%     | 81.5%     | 74.0%     |  |
| No binary gripper       | Teacher 1 - Seed 1 | N/A                | 74.4%        | 77.2%     | 53.1%     | 81.4%     | 73.4%     | 87.0%     | 43.6%              | 61.5%     | 36.5%     | 0.0%      | 61.5%     | 58.5%     |  |
| MSE & no binary gripper | Teacher 1 - Seed 1 | N/A                | 72.2%        | 74.9%     | 53.6%     | 78.4%     | 71.3%     | 82.8%     | 30.8%              | 44.5%     | 23.5%     | 7.0%      | 20.0%     | 59.0%     |  |
| MSE & no binary gripper | Teacher 2 - Seed 1 | N/A                | 58.96%       | 74.75%    | 0.27%     | 72.57%    | 65.36%    | 81.82%    | 24.20%             | 36.00%    | 0.00%     | 0.00%     | 24.50%    | 60.50%    |  |
| MSE & no binary gripper | Teacher 1 - Seed 2 | N/A                | 72.4%        | 73.8%     | 55.5%     | 78.0%     | 71.0%     | 83.7%     | 24.4%              | 45.0%     | 24.0%     | 0.5%      | 13.5%     | 39.0%     |  |
| MSE & no binary gripper | Teacher 2 - Seed 2 | N/A                | 59.13%       | 73.18%    | 0.18%     | 75.00%    | 66.27%    | 81.00%    | 23.20%             | 27.00%    | 0.00%     | 0.50%     | 24.50%    | 64.00%    |  |
| No binary gripper       | Teacher 2 - Seed 1 | N/A                | 57.78%       | 72.18%    | 1.00%     | 68.00%    | 66.82%    | 80.91%    | 8.80%              | 10.00%    | 0.00%     | 0.50%     | 19.00%    | 14.50%    |  |
| No binary gripper       | Teacher 1 - Seed 2 | N/A                | 74.5%        | 76.5%     | 52.5%     | 82.2%     | 74.3%     | 86.9%     | 16.4%              | 55.5%     | 12.5%     | 0.0%      | 8.0%      | 6.0%      |  |
| No binary gripper       | Teacher 2 - Seed 2 | N/A                | 57.70%       | 70.18%    | 1.00%     | 69.85%    | 67.45%    | 80.00%    | 13.90%             | 24.00%    | 0.00%     | 0.50%     | 29.00%    | 16.00%    |  |
| Skill Generalization    |                    |                    |              |           |           |           |           |           |                    |           |           |           |           |           |  |
| ILL-s2r                 | Teacher 1 - Seed 1 | 65.7%              | 58.9%        | 38.1%     | 38.5%     | 44.7%     | 82.5%     | 90.5%     | 54.8%              | 30.0%     | 42.5%     | 42.0%     | 93.0%     | 66.5%     |  |
| ILL-s2r                 | Teacher 1 - Seed 2 | 64.4%              | 59.2%        | 35.2%     | 42.3%     | 48.0%     | 80.8%     | 89.8%     | 49.6%              | 22.4%     | 44.5%     | 29.5%     | 91.5%     | 60.0%     |  |
| ILL-s2r                 | Teacher 2 - Seed 1 | 64.8%              | 53.8%        | 15.7%     | 40.9%     | 40.7%     | 81.4%     | 90.5%     | 54.6%              | 27.0%     | 41.0%     | 39.5%     | 89.0%     | 76.5%     |  |
| ILL-s2r                 | Teacher 2 - Seed 2 | 63.8%              | 52.1%        | 12.5%     | 40.8%     | 36.4%     | 80.0%     | 91.0%     | 48.4%              | 20.5%     | 30.5%     | 35.0%     | 91.0%     | 65.0%     |  |
| No Transformer          | Teacher 1 - Seed 1 | 61.5%              | 52.7%        | 22.9%     | 38.3%     | 34.4%     | 79.2%     | 88.6%     | 43.6%              | 30.0%     | 22.5%     | 14.0%     | 82.5%     | 69.0%     |  |
| No Transformer          | Teacher 1 - Seed 2 | 57.0%              | 45.1%        | 11.7%     | 35.7%     | 16.7%     | 75.5%     | 85.7%     | 44.4%              | 24.5%     | 28.5%     | 16.0%     | 79.0%     | 74.0%     |  |
| No Transformer          | Teacher 2 - Seed 1 | 64.4%              | 54.2%        | 15.3%     | 41.1%     | 40.9%     | 81.2%     | 92.3%     | 47.8%              | 31.5%     | 36.0%     | 17.5%     | 88.5%     | 65.5%     |  |
| No Transformer          | Teacher 2 - Seed 2 | 63.6%              | 53.2%        | 17.8%     | 39.4%     | 38.3%     | 80.6%     | 90.3%     | 45.7%              | 24.5%     | 26.5%     | 27.5%     | 87.5%     | 62.5%     |  |
| No object parameters    | Teacher 1 - Seed 1 | 65.0%              | 50.8%        | 29.9%     | 15.0%     | 38.3%     | 82.6%     | 88.0%     | 32.1%              | 23.0%     | 18.5%     | 24.0%     | 36.0%     | 59.0%     |  |
| No object parameters    | Teacher 1 - Seed 2 | 65.0%              | 58.0%        | 29.9%     | 41.0%     | 49.9%     | 81.9%     | 87.4%     | 29.3%              | 24.5%     | 21.0%     | 21.5%     | 27.5%     | 52.0%     |  |
| No object parameters    | Teacher 2 - Seed 1 | 61.7%              | 52.2%        | 24.0%     | 33.3%     | 39.0%     | 78.5%     | 86.0%     | 53.5%              | 29.5%     | 42.0%     | 29.0%     | 87.5%     | 79.5%     |  |
| No object parameters    | Teacher 2 - Seed 2 | 62.3%              | 53.8%        | 24.0%     | 38.7%     | 38.6%     | 80.6%     | 86.9%     | 49.6%              | 30.0%     | 33.5%     | 30.0%     | 84.0%     | 70.5%     |  |

**Table S12: Sim-to-Real Transfer Success.** Ablations of the components of the sim-to-real policy. This table gives a full account of all evaluations for the equivalent Table 2 in the main paper. We execute the stochastic and deterministic policies in simulation and on the robots, respectively, unless otherwise specified.

from, and 2 runs for vision agents trained from real data. Here, we provide the results for each of the runs in each setting, and also present the results for each specific triplet. We hope that this provides a better sense of the variance in each setting. Entries in Table S12 correspond to Table 2, whereas entries in Table S13 correspond to Table 3.

## E.5 Qualitative Analysis

In the main text we described different challenges posed by the test triplets. Aside from the quantitative success scores above, it is therefore also interesting to look at the resulting policies qualitatively, and examine whether our agent visibly learns to overcome these challenges. Even if such an approach is naturally to be taken only as anecdotal, it nevertheless provides an indication of open challenges that are worth pursuing further.

We therefore performed a number of evaluations with the best-performing agent, the Skill Mastery CRR-IMP policy trained on sim-to-real agent data (see Table S13). We adversarially moved the objects to generate challenging situations and observed the agent’s behaviour.

**Triplet 1.** The main challenge of this triplet is the need to precisely orient the gripper, since closing them on the slanted sides of the object will fail. The agent exhibits this behaviour, waiting to close the gripper until the wrist is properly aligned (Figure S17(a)).

**Triplet 2.** The bottom object in this triplet can be oriented in such a way that its top surface is slanted, making it impossible to stack without first tipping it over. The agent can be seen to perform this kind of behaviour, although not perfectly reliably; if the object is already oriented so that it can be tilted by pushing it against the basket’s slope, it will do so (Figure S17(b)). However, if the bottom object’s orientation is unfavourable, it will not rotate it to achieve this (Figure S17(c)), and instead try to naively stack the objects.

**Triplet 3.** The main challenge in this triplet lies in the asymmetry of the top object, and needing to balance it onto the bottom one in such a way that their centroids are aligned. Even if disturbed into an off-center grasp, the agent still aligns both objects precisely (Figure S17(d)).

| Method                                    | Run    | Real-Robot Success |           |           |           |           |           |
|-------------------------------------------|--------|--------------------|-----------|-----------|-----------|-----------|-----------|
|                                           |        | Triplet Avg.       | Triplet 1 | Triplet 2 | Triplet 3 | Triplet 4 | Triplet 5 |
| Scripted agent                            | N/A    | <b>51.2%</b>       | 36.3%     | 23.0%     | 34.4%     | 84.9%     | 77.6%     |
| <i>Skill Mastery</i>                      |        |                    |           |           |           |           |           |
| BC (scripted agent data)                  | Seed 1 | <b>50.8%</b>       | 25.5%     | 22.5%     | 35.0%     | 85.5%     | 85.5%     |
| BC (scripted agent data)                  | Seed 2 | <b>55.9%</b>       | 43.5%     | 31.0%     | 41.5%     | 83.5%     | 80.0%     |
| CRR (scripted agent data)                 | Seed 1 | <b>40.4%</b>       | 17.0%     | 11.4%     | 41.5%     | 66.0%     | 66.0%     |
| CRR (scripted agent data)                 | Seed 2 | <b>46.4%</b>       | 24.0%     | 44.5%     | 35.0%     | 62.0%     | 66.5%     |
| —Sim-to-real agent for test triplets data | N/A    | <b>69.5%</b>       | 76.4%     | 52.3%     | 60.4%     | 86.5%     | 72.0%     |
| BC-IMP (sim-to-real agent data)           | Seed 1 | <b>75.1%</b>       | 76.0%     | 59.5%     | 70.0%     | 90.5%     | 79.5%     |
| BC-IMP (sim-to-real agent data)           | Seed 2 | <b>74.1%</b>       | 75.0%     | 62.0%     | 71.5%     | 85.0%     | 77.0%     |
| CRR-IMP (sim-to-real agent data)          | Seed 1 | <b>81.0%</b>       | 88.0%     | 66.5%     | 74.0%     | 88.0%     | 88.5%     |
| CRR-IMP (sim-to-real agent data)          | Seed 2 | <b>82.1%</b>       | 86.5%     | 70.0%     | 76.5%     | 88.5%     | 89.0%     |
| <i>Skill Generalization</i>               |        |                    |           |           |           |           |           |
| —Suboptimal agent for training set data   | N/A    | <b>32.6%</b>       | 21.5%     | 16.5%     | 17.0%     | 60.0%     | 48.0%     |
| BC-IMP (suboptimal agent data)            | Seed 1 | <b>48.2%</b>       | 23.0%     | 33.0%     | 37.0%     | 82.0%     | 66.0%     |
| BC-IMP (suboptimal agent data)            | Seed 2 | <b>49.8%</b>       | 23.0%     | 45.5%     | 41.5%     | 73.0%     | 66.0%     |
| CRR-IMP (suboptimal agent data)           | Seed 1 | <b>55.0%</b>       | 33.0%     | 34.5%     | 49.5%     | 88.0%     | 70.0%     |
| CRR-IMP (suboptimal agent data)           | Seed 2 | <b>57.3%</b>       | 36.5%     | 36.0%     | 46.5%     | 86.5%     | 81.0%     |

**Table S13: Real-Robot Success.** Different approaches for solving our RGB-stacking tasks in the real world. This table gives a full account of all evaluations for the equivalent Table 3 in the main paper. All the evaluations for IIL-s2r is given in Table S12.

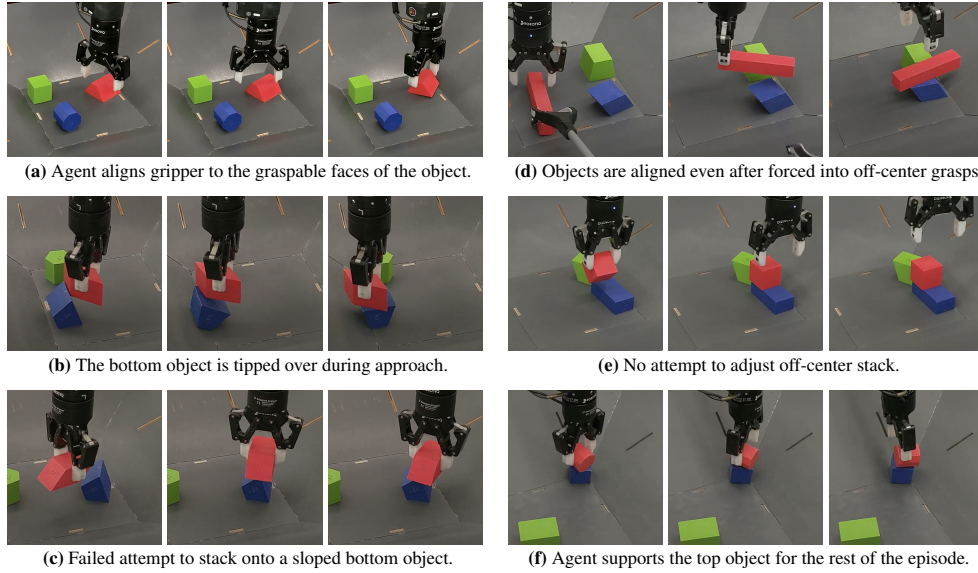

**Figure S17: Agent behaviour during challenging situations.**

**Triplet 4.** Considered the easiest triplet, the main challenge is to align the centroids, even when the top object can be placed far off-center on the larger bottom object. Perhaps surprisingly, while the agent usually places the object in the center, it shows no attempts to recover from occasional off-center stacks (Figure S17(e)).

**Triplet 5.** Due to the rounded cross-section of the top object, there is a high risk of it rolling off after stacking. As a testament to this, the agent will often stay close to the object after stacking, sometimes (but not always) even supporting it with the gripper until the end of the episode when the bottom object is on a slope and a stack thus otherwise impossible (Figure S17(f)).

## F Additional Related Work

Our work deals with real-world vision-based stacking with a diverse set of objects and a learned policy. We therefore did not discuss, in the main text, prior work on e.g. stacking from extracted features or in simulation. For completeness, we discuss such works here.

Furrer et al [39] is a very interesting paper on pick-and-place strategies with classical robotics methods that we have now included in our main text discussion. We should highlight here that it deals with only 6 specific stones that offer wide support and have high friction - in contrast to the 152 objects with diverse geometry we propose in our benchmark. To the best of our understanding, their method would neither be able to handle Triplet 2 (flipping the bottom object if needed), nor generalize to unseen objects, as is the case for our “Skill Generalization” task. We should also note that the evaluation on that work was done on a total of 11 episodes (or a maximum of 33 possible stacks in that setup) - in contrast to the more than 54,000 episodes we have evaluated our various choices with.

Duan et al [40] deals with cube stacking in simulation only with policies that have access to task demonstrations, the state information of each cube and no visual input. Later work by Li et al [41] in the same environment shows that reinforcement learning without demonstrations can learn to stack the cubes from state. Our stacking task is also related to other manipulation tasks, such as dry stacking [42, 43] where rocks of irregular shapes must be stacked to form a wall, but these methods do not address. However, while these methods deal with high-level planning and goal understanding, our benchmark task requires dealing with low-level contact dynamics and perception to make real object stacking possible with strategies that emerge from RL training in simulation.

Noseworthy et al [44] also deals with high-level planning for stacking cubes, this time in the real world. The challenge in this work is that each cube was created with a slightly different center of mass, requiring precise stacks. However, this is not a vision-based task: each cube is also AR-tagged and therefore privileged information about each cube are known during evaluation. Similarly, Macias et al [45] use a combination of binary markers on objects as well as high level planning to perform pick and place stacking.

Some vision-based methods have addressed a related but distinct problem of predicting stack stability [46, 47, 48, 49]. Lerer et al [47] deal with intuition around physics and identifying whether a tower block will collapse, and even the trajectory the blocks will take, focusing primarily on simulation experiments. Similarly, Hamrick et al [49] deal with identifying stability of simulated block towers, with the aid of Graph Neural Networks and without using vision. They also attempt to address which parts of the tower to “glue” in order to fix an unstable tower. Groth et al [48] classify structures as stable or unstable from visual inputs and learn “stackability affordances” for objects of various shapes. However, this line of work does not address the dynamic aspects of manipulation, as there is no physical robot interacting with the objects.

## G Additional Supplementary Material

In this appendix we attempted to provide as much detail as we could regarding our benchmark, our environments, and our implementation and experimental details. As part of the material that supplement this paper, we also include a video file that shows our agents in action, as well as designs and instructions for recreating the real robotic cell and the STL files for the RGB-Objects in Figure S2.

Here is a list of what is included in the supplementary material as part of this submission:

- Video that supplements the main text.
- BOM (Bill of materials, list of things and quantity) to build:
  - Cell
  - Basket
- Building instructions:
  - Cell
  - Basket

681                   – Wiring diagram

682   We will further release, post-submission under an Apache Licence, the following:

- 683           • 3D Assembly drawing to complete / integrate assembly instruction
- 684           • 3D models and Manufacturing drawing for all the parts (cell and Basket) that need to be:
  - 685               – Machined
  - 686               – 3D printed
  - 687               – Laser Cut
- 688           • All STL files for the training set, held-out set, and the specific triplets, in separate folders.
- 689           • A version of the simulated environment.



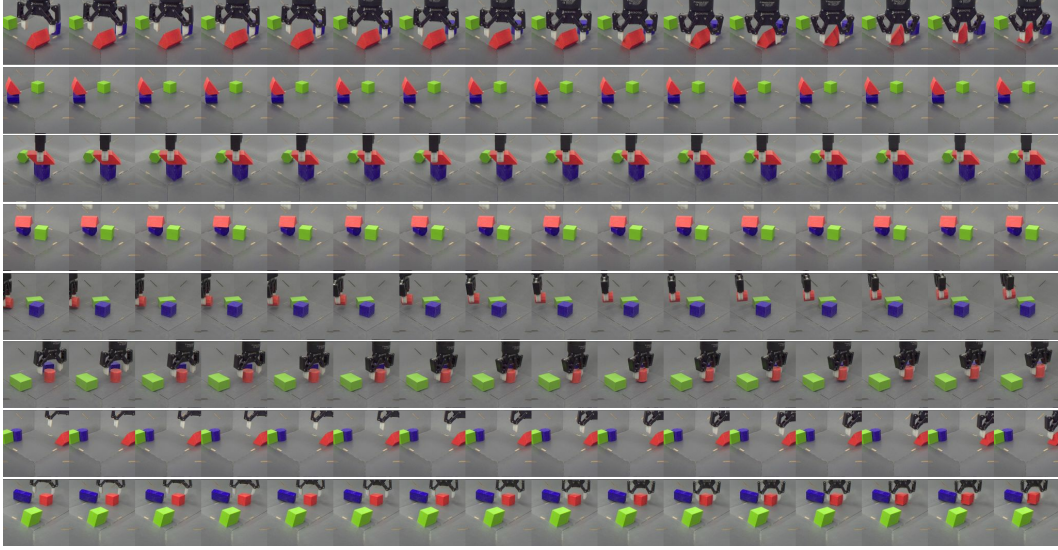

(a) Real-world image sequences without image augmentations.

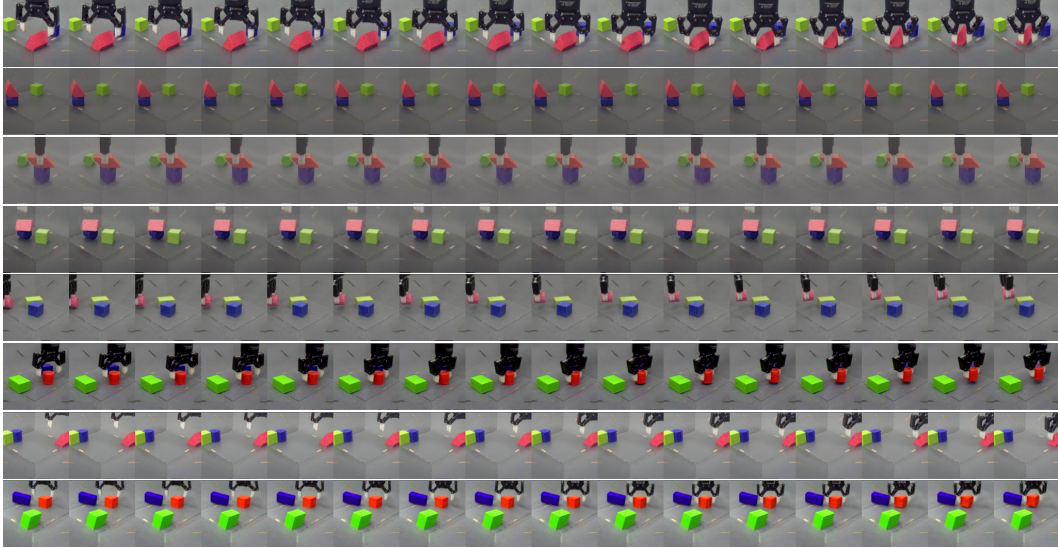

(b) Real-world image sequences with image augmentations.

**Figure S18:** Real-world image sequences without and with the image augmentations listed in [Table S7](#). Note that we randomly sample different color and translation perturbations for each sequence in a batch, but we use the same random perturbations for all the images within a sequence.

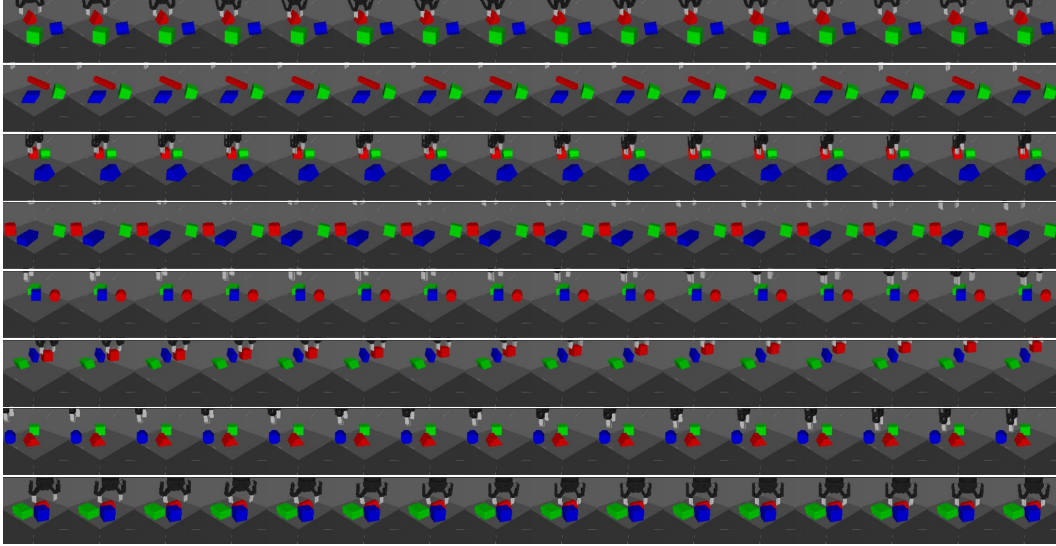

(a) Image sequences from the simulation without image augmentations.

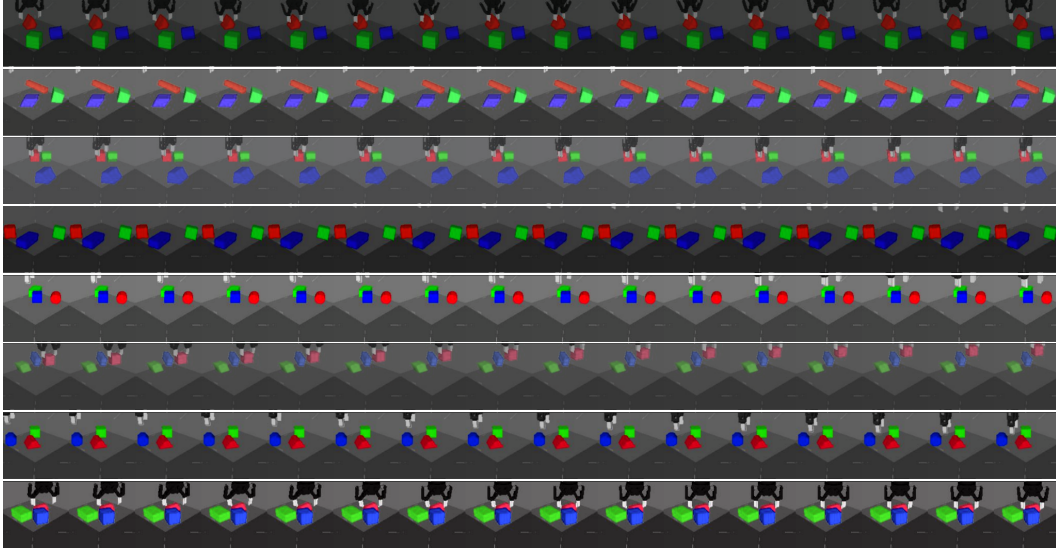

(b) Image sequences from the simulation with image augmentations.

**Figure S19:** Image sequences from simulation without and with the image augmentations listed in Table S7. Note that we randomly sample different color and translation perturbations for each sequence in a batch, but we use the same random perturbations for all the images within a sequence. Although in our experiments we always use image augmentation in combination with domain randomization, here we show example sequences without domain randomization for visualization clarity. See Figure S20 for examples with domain randomization.

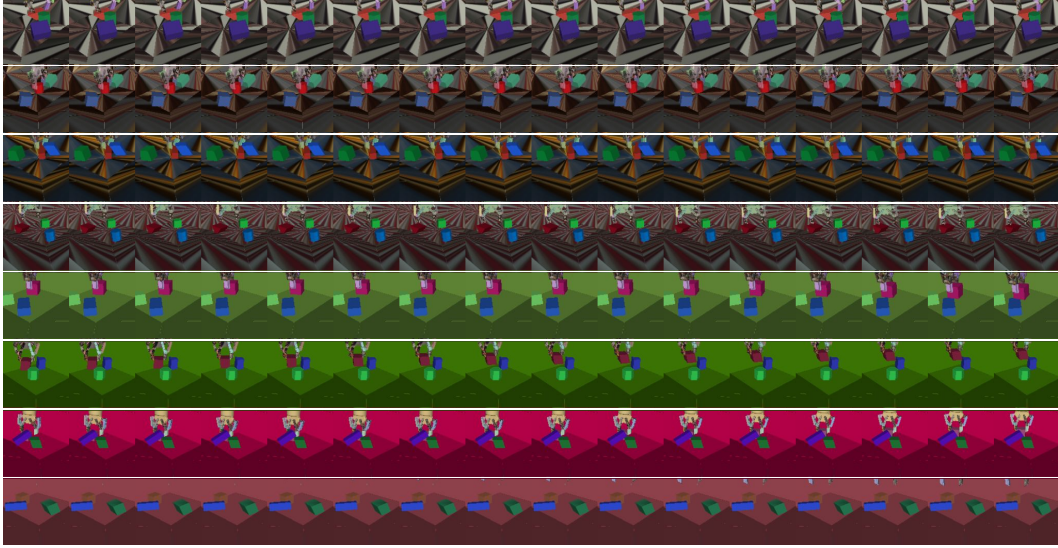

(a) Image sequences from the domain-randomized simulation without image augmentations.

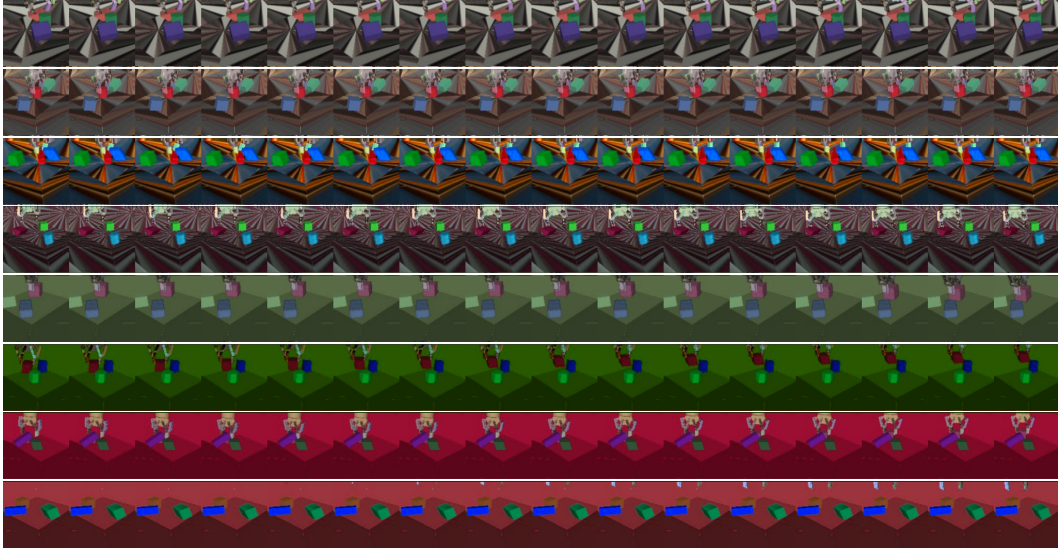

(b) Image sequences from the domain-randomized simulation with image augmentations.

**Figure S20:** Image sequences from the domain-randomized simulation without and with the image augmentations listed in [Table S7](#). Note that we randomly sample different color and translation perturbations for each sequence in a batch, but we use the same random perturbations for all the images within a sequence. See [Figure S19](#) for examples without domain randomization.



## References

- [1] M. Mason. The mechanics of manipulation. In *Proceedings. 1985 IEEE International Conference on Robotics and Automation*, volume 2, pages 544–548, March 1985. doi:10.1109/ROBOT.1985.1087242.
- [2] C. Ferrari and J. Canny. Planning optimal grasps. In *Proceedings 1992 IEEE International Conference on Robotics and Automation*, pages 2290–2295 vol.3, 1992. doi:10.1109/ROBOT.1992.219918.
- [3] J. Mahler, J. Liang, S. Niyaz, M. Laskey, R. Doan, X. Liu, J. A. Ojea, and K. Goldberg. Dex-net 2.0: Deep learning to plan robust grasps with synthetic point clouds and analytic grasp metrics. *CoRR*, abs/1703.09312, 2017. URL <http://arxiv.org/abs/1703.09312>.
- [4] D. Wang, D. Tseng, P. Li, Y. Jiang, M. Guo, M. Danielczuk, J. Mahler, J. Ichnowski, and K. Goldberg. Adversarial grasp objects. In *Proc. IEEE Conf. on Automation Science and Engineering (CASE)*, pages 241–248. IEEE, 2019.
- [5] R. M. Murray, S. S. Sastry, and L. Zexiang. *A Mathematical Introduction to Robotic Manipulation*. CRC Press, Inc., USA, 1st edition, 1994. ISBN 0849379814.
- [6] B. Çalli, A. Walsman, A. Singh, S. S. Srinivasa, P. Abbeel, and A. M. Dollar. Benchmarking in manipulation research: The YCB object and model set and benchmarking protocols. *CoRR*, abs/1502.03143, 2015. URL <http://arxiv.org/abs/1502.03143>.
- [7] S. Levine, P. Pastor, A. Krizhevsky, and D. Quillen. Learning hand-eye coordination for robotic grasping with deep learning and large-scale data collection. *CoRR*, abs/1603.02199, 2016. URL <http://arxiv.org/abs/1603.02199>.
- [8] L. Pinto and A. Gupta. Supersizing self-supervision: Learning to grasp from 50k tries and 700 robot hours. *CoRR*, abs/1509.06825, 2015. URL <http://arxiv.org/abs/1509.06825>.
- [9] A. Zeng, S. Song, K. Yu, E. Donlon, F. R. Hogan, M. Bauzá, D. Ma, O. Taylor, M. Liu, E. Romo, N. Fazeli, F. Alet, N. C. Daffe, R. Holladay, I. Morona, P. Q. Nair, D. Green, I. Taylor, W. Liu, T. A. Funkhouser, and A. Rodriguez. Robotic pick-and-place of novel objects in clutter with multi-affordance grasping and cross-domain image matching. *CoRR*, abs/1710.01330, 2017. URL <http://arxiv.org/abs/1710.01330>.
- [10] N. Mansard, O. Stasse, P. Evrard, and A. Kheddar. A versatile generalized inverted kinematics implementation for collaborative working humanoid robots: The stack of tasks. In *International Conference on Advanced Robotics*, Munich, Germany, 2009.
- [11] A. Rocchi, E. M. Hoffman, D. G. Caldwell, and N. G. Tsagarakis. Opensot: a whole-body control library for the compliant humanoid robot coman. In *IEEE International Conference in Robotics and Automation*, 2015.
- [12] F. Kanehiro, F. Lamiroux, O. Kanoun, E. Yoshida, and J. Laumond. A local collision avoidance method for non-strictly convex polyhedra. In *Robotics: Science and Systems*, 2008.
- [13] C. Fang, A. Rocchi, E. M. Hoffman, N. G. Tsagarakis, and D. G. Caldwell. Efficient self-collision avoidance based on focus of interest for humanoid robots. In *International Conference on Humanoid Robots*, 2015.
- [14] B. Stellato, G. Banjac, P. Goulart, A. Bemporad, and S. Boyd. OSQP: an operator splitting solver for quadratic programs. *Mathematical Programming Computation*, 12(4): 637–672, 2020. doi:10.1007/s12532-020-00179-2. URL <https://doi.org/10.1007/s12532-020-00179-2>.
- [15] R. I. Hartley and P. Sturm. Triangulation. *Comput. Vis. Image Underst.*, 68(2):146–157, Nov. 1997. ISSN 1077-3142. doi:10.1006/cviu.1997.0547. URL <https://doi.org/10.1006/cviu.1997.0547>.
- [16] M.-K. Hu. Visual pattern recognition by moment invariants. *IRE transactions on information theory*, 8(2):179–187, 1962.

- [17] E. Todorov, T. Erez, and Y. Tassa. Mujoco: A physics engine for model-based control. In *2012 IEEE/RSJ International Conference on Intelligent Robots and Systems*, pages 5026–5033. IEEE, 2012.
- [18] A. Abdolmaleki, J. T. Springenberg, Y. Tassa, R. Munos, N. Heess, and M. Riedmiller. Maximum a posteriori policy optimisation. 2018.
- [19] V. Mnih, K. Kavukcuoglu, D. Silver, A. A. Rusu, J. Veness, M. G. Bellemare, A. Graves, M. Riedmiller, A. K. Fidjeland, G. Ostrovski, S. Petersen, C. Beattie, A. Sadik, I. Antonoglou, H. King, D. Kumaran, D. Wierstra, S. Legg, and D. Hassabis. Human-level control through deep reinforcement learning. *Nature*, 518(7540):529–533, 2015.
- [20] R. Munos, T. Stepleton, A. Harutyunyan, and M. G. Bellemare. Safe and efficient off-policy reinforcement learning. In *Proceedings of the 30th International Conference on Neural Information Processing Systems, NeurIPS’16*, page 1054–1062, Red Hook, NY, USA, 2016. Curran Associates Inc. ISBN 9781510838819.
- [21] A. Abdolmaleki, J. T. Springenberg, J. Degraeve, S. Bohez, Y. Tassa, D. Belov, N. Heess, and M. A. Riedmiller. Relative entropy regularized policy iteration. *CoRR*, abs/1812.02256, 2018. URL <http://arxiv.org/abs/1812.02256>.
- [22] Z. Wang, A. Novikov, K. Zolna, J. S. Merel, J. T. Springenberg, S. E. Reed, B. Shahriari, N. Siegel, C. Gulcehre, N. Heess, and N. de Freitas. Critic regularized regression. In *Advances in Neural Information Processing Systems (NeurIPS)*, 2020.
- [23] M. G. Bellemare, W. Dabney, and R. Munos. A distributional perspective on reinforcement learning. In D. Precup and Y. W. Teh, editors, *Proceedings of the 34th International Conference on Machine Learning*, volume 70 of *Proceedings of Machine Learning Research*, pages 449–458, International Convention Centre, Sydney, Australia, 06–11 Aug 2017. PMLR. URL <http://proceedings.mlr.press/v70/bellemare17a.html>.
- [24] F. Sadeghi and S. Levine. Cad2rl: Real single-image flight without a single real image. *arXiv preprint arXiv:1611.04201*, 2016.
- [25] J. Tobin, L. Biewald, R. Duan, M. Andrychowicz, A. Handa, V. Kumar, B. McGrew, A. Ray, J. Schneider, P. Welinder, et al. Domain randomization and generative models for robotic grasping. In *2018 IEEE/RSJ International Conference on Intelligent Robots and Systems (IROS)*, pages 3482–3489. IEEE, 2018.
- [26] A. Krizhevsky, I. Sutskever, and G. E. Hinton. Imagenet classification with deep convolutional neural networks. *Advances in neural information processing systems*, 25:1097–1105, 2012.
- [27] K. Bousmalis, A. Irpan, P. Wohlhart, Y. Bai, M. Kelcey, M. Kalakrishnan, L. Downs, J. Ibarz, P. Pastor, K. Konolige, et al. Using simulation and domain adaptation to improve efficiency of deep robotic grasping. In *2018 IEEE International Conference on Robotics and Automation (ICRA)*, pages 4243–4250. IEEE, 2018.
- [28] K. Rao, C. Harris, A. Irpan, S. Levine, J. Ibarz, and M. Khansari. RL-cycleGAN: Reinforcement learning aware simulation-to-real. In *Proceedings of the IEEE/CVF Conference on Computer Vision and Pattern Recognition*, pages 11157–11166, 2020.
- [29] D. Ho, K. Rao, Z. Xu, E. Jang, M. Khansari, and Y. Bai. Retinagan: An object-aware approach to sim-to-real transfer. *arXiv preprint arXiv:2011.03148*, 2020.
- [30] Y. Ganin, E. Ustinova, H. Ajakan, P. Germain, H. Larochelle, F. Laviolette, M. Marchand, and V. Lempitsky. Domain-adversarial training of neural networks. *The journal of machine learning research*, 17(1):2096–2030, 2016.
- [31] E. Tzeng, J. Hoffman, K. Saenko, and T. Darrell. Adversarial discriminative domain adaptation. In *Proceedings of the IEEE conference on computer vision and pattern recognition*, pages 7167–7176, 2017.

- [32] S. James, P. Wohlhart, M. Kalakrishnan, D. Kalashnikov, A. Irpan, J. Ibarz, S. Levine, R. Hadsell, and K. Bousmalis. Sim-to-real via sim-to-sim: Data-efficient robotic grasping via randomized-to-canonical adaptation networks. In *Proceedings of the IEEE Conference on Computer Vision and Pattern Recognition*, pages 12627–12637, 2019.
- [33] S. James, P. Wohlhart, M. Kalakrishnan, D. Kalashnikov, A. Irpan, J. Ibarz, S. Levine, R. Hadsell, and K. Bousmalis. Sim-to-real via sim-to-sim: Data-efficient robotic grasping via randomized-to-canonical adaptation networks. *CoRR*, abs/1812.07252, 2018. URL <http://arxiv.org/abs/1812.07252>.
- [34] O. M. Andrychowicz, B. Baker, M. Chociej, R. Jozefowicz, B. McGrew, J. Pachocki, A. Petron, M. Plappert, G. Powell, A. Ray, et al. Learning dexterous in-hand manipulation. *The International Journal of Robotics Research*, 39(1):3–20, 2020.
- [35] A. Vaswani, N. Shazeer, N. Parmar, J. Uszkoreit, L. Jones, A. N. Gomez, L. Kaiser, and I. Polosukhin. Attention is all you need. *arXiv preprint arXiv:1706.03762*, 2017.
- [36] Z. Dai, Z. Yang, Y. Yang, J. Carbonell, Q. V. Le, and R. Salakhutdinov. Transformer-xl: Attentive language models beyond a fixed-length context. *arXiv preprint arXiv:1901.02860*, 2019.
- [37] A. Dosovitskiy, L. Beyer, A. Kolesnikov, D. Weissenborn, X. Zhai, T. Unterthiner, M. Dehghani, M. Minderer, G. Heigold, S. Gelly, et al. An image is worth 16x16 words: Transformers for image recognition at scale. *arXiv preprint arXiv:2010.11929*, 2020.
- [38] D. P. Kingma and J. Ba. Adam: A method for stochastic optimization. In *International Conference on Learning Representations*, 2015.
- [39] F. Furrer, M. Wermelinger, H. Yoshida, F. Gramazio, M. Kohler, R. Siegwart, and M. Hutter. Autonomous robotic stone stacking with online next best object target pose planning. In *2017 IEEE International Conference on Robotics and Automation (ICRA)*, pages 2350–2356, May 2017. doi:10.1109/ICRA.2017.7989272.
- [40] Y. Duan, M. Andrychowicz, B. Stadie, O. Jonathan Ho, J. Schneider, I. Sutskever, P. Abbeel, and W. Zaremba. One-shot imitation learning. In I. Guyon, U. V. Luxburg, S. Bengio, H. Wallach, R. Fergus, S. Vishwanathan, and R. Garnett, editors, *Advances in Neural Information Processing Systems*, volume 30. Curran Associates, Inc., 2017. URL <https://proceedings.neurips.cc/paper/2017/file/ba3866600c3540f67c1e9575e213be0a-Paper.pdf>.
- [41] R. Li, A. Jabri, T. Darrell, and P. Agrawal. Towards practical multi-object manipulation using relational reinforcement learning. In *2020 IEEE International Conference on Robotics and Automation (ICRA)*, pages 4051–4058. IEEE, 2020.
- [42] Y. Liu, S. M. Shamsi, L. Fang, C. Chen, and N. Napp. Deep q-learning for dry stacking irregular objects. pages 1569–1576, 10 2018. doi:10.1109/IROS.2018.8593619.
- [43] A. Menezes, P. Vicente, A. Bernardino, and R. Ventura. From rocks to walls: A model-free reinforcement learning approach to dry stacking with irregular rocks. In *Proceedings of the IEEE/CVF Conference on Computer Vision and Pattern Recognition (CVPR) Workshops*, pages 2057–2065, June 2021.
- [44] M. Noseworthy, C. Moses, I. Brand, S. Castro, L. Kaelbling, T. Lozano-Pérez, and N. Roy. Active learning of abstract plan feasibility. In *RSS*, 2021.
- [45] N. Macias and J. Wen. Vision guided robotic block stacking. In *2014 IEEE/RSJ International Conference on Intelligent Robots and Systems*, pages 779–784, 2014. doi:10.1109/IROS.2014.6942647.
- [46] Z. Jia, A. C. Gallagher, A. Saxena, and T. Chen. 3d reasoning from blocks to stability. *IEEE Transactions on Pattern Analysis and Machine Intelligence*, 37(5):905–918, 2015. doi:10.1109/TPAMI.2014.2359435.



- 832 [47] A. Lerer, S. Gross, and R. Fergus. Learning physical intuition of block towers by example. In  
833 M. F. Balcan and K. Q. Weinberger, editors, *Proceedings of The 33rd International Conference*  
834 *on Machine Learning*, volume 48 of *Proceedings of Machine Learning Research*, pages 430–  
835 438, New York, New York, USA, 20–22 Jun 2016. PMLR. URL [https://proceedings.](https://proceedings.mlr.press/v48/lerer16.html)  
836 [mlr.press/v48/lerer16.html](https://proceedings.mlr.press/v48/lerer16.html).
- 837 [48] O. Groth, F. B. Fuchs, I. Posner, and A. Vedaldi. Shapestacks: Learning vision-based phys-  
838 ical intuition for generalised object stacking. In *Proceedings of the European Conference on*  
839 *Computer Vision (ECCV)*, pages 702–717, 2018.
- 840 [49] J. B. Hamrick, K. R. Allen, V. Bapst, T. Zhu, K. R. McKee, J. Tenenbaum, and P. W. Battaglia.  
841 Relational inductive bias for physical construction in humans and machines. In C. Kalish,  
842 M. A. Rau, X. J. Zhu, and T. T. Rogers, editors, *Proceedings of the 40th Annual Meeting*  
843 *of the Cognitive Science Society, CogSci 2018, Madison, WI, USA, July 25-28, 2018*. cog-  
844 nitivesciencesociety.org, 2018. URL [https://mindmodeling.org/cogsci2018/papers/](https://mindmodeling.org/cogsci2018/papers/0341/index.html)  
845 [0341/index.html](https://mindmodeling.org/cogsci2018/papers/0341/index.html).

846
