# Supplementary material
Source: ML conference proceedings conference paper supplement (https://proceedings.mlr.press/v164/lee22b.html)
Supplement: Supplementary file 6 [file lee22b-supp.zip]

| ITEM | Description                               | Manufacturer  | Part Number     | Details     | Vendor        | Qty per Cell | Used for:                        |
|------|-------------------------------------------|---------------|-----------------|-------------|---------------|--------------|----------------------------------|
| 1    | STRUT PROFILE 90X90X45 M12/M12            | Bosch Rexroth | 3842992388      | 2350 mm     | KJN           | 4            | Cage                             |
| 2    | STRUT PROFILE 45X45L M12/M12              | Bosch Rexroth | 3842992427      | 729 mm      | KJN           | 4            | Cage                             |
| 3    | STRUT PROFILE 45X90L d17v/d17v            | KJN           | KJN992432       | 1910 mm     | KJN           | 5            | Cage                             |
| 4    | STRUT PROFILE 45X90L d17v/d17v            | KJN           | KJN992432       | 910 mm      | KJN           | 6            | Cage                             |
| 5    | STRUT PROFILE 45X90L d17v/d17v            | KJN           | KJN992432       | 410 mm      | KJN           | 8            | Cage                             |
| 6    | STRUT PROFILE 90X90 M12/ --               | KJN           | KJN992415       | 684 mm      | KJN           | 1            | Cage                             |
| 7    | STRUT PROFILE 45X45L                      | Bosch Rexroth | 3842992425      | 45x45x800   | KJN           | 4            | Basket                           |
| 9    | STRUT PROFILE 45X45L                      | Bosch Rexroth | 3842992425      | 45x45x193.5 | KJN           | 2            | Basket 2.0 - Front Legs          |
| 10   | STRUT PROFILE 45X45L                      | Bosch Rexroth | 3842992425      | 45x45x181.5 | KJN           | 2            | Basket 2.0 - Rear Legs           |
| 11   | STRUT PROFILE 45X45L                      | Bosch Rexroth | 3842992425      | 45x45x400   | KJN           | 1            | Basket 2.0 - Rear Camera Support |
| 12   | STRUT PROFILE 45X45L                      | Bosch Rexroth | 3842992425      | 45x45x105   | KJN           | 1            | Basket 2.0 - Rear Camera Support |
| 13   | Gusset 180x180 Dynamic Load               | Bosch Rexroth | 3842555616      |             | KJN           | 12           | Cage                             |
| 14   | Mounting Kit for Gussets                  | Bosch Rexroth | 3842548955      |             | KJN           | 12           | Cage                             |
| 15   | Bolt Connector Slot 10 D17x90             | Bosch Rexroth | 3842555588      |             | KJN           | 30           | Cage                             |
| 16   | Bracket 45x90 with Fittings               | KJN           | KJN523570       |             | KJN           | 20           | Cage                             |
| 17   | Bracket 45x45 with Fittings               | KJN           | KJN523561       |             | KJN           | 10           | Basket                           |
| 18   | Cubic Connector 45x45 3 way               | KJN           | KJN524480       |             | KJN           | 8            | 4x Cage -- 4x Basket             |
| 19   | M8x25 T-Bolt & Nut (10 in a pack)         | KJN           | KJN528718       |             | KJN           | 4            | Cage + Basket                    |
| 20   | S12x30 T50 Self Tapping Core Screw (10pk) | KJN           | KJN530236       |             | KJN           | 5            | Cage + Basket                    |
| 21   | M8x25 CSK screws black                    | RS Pro        | SSK-M8-25-A2    |             | RS Components | 8            | Mounting Plate                   |
| 22   | M8x40 DIN912 screws                       | Accu Screws   |                 |             | Accu Screws   | 8            | Wheels                           |
| 23   | S12x30 T50 Self Tapping Core Screw        | Accu Screws   |                 |             | Accu Screws   | 8            | Wheels                           |
| 24   | Screw for gripper                         | Accu Screws   |                 | M5x30       | Accu Screws   | 2            | Gripper                          |
| 25   | M8x20mm Cap Head Screws (DIN 912)         | Accu Screws   | SSCF-M8-20-A2   |             | Accu Screws   | 7            | Sawyer Mounting screws           |
| 26   | M3x6mm cap head screws                    | Accu Screws   | SSCF-M3-8-A4-BL |             | Accu Screws   | 9            | Camera Mounts                    |
| 27   | M3x8mm cap head screws                    | Accu Screws   | SSCF-M3-8-A4-BL |             | Accu Screws   | 4            | Camera stand to base mounting    |
| 28   | M3 Brass threaded inserts                 | RS            | 278-534         |             | RS            | 12           | Camera stand to base mounting    |
| 29   | M8x25 T-Bolt & Nut                        | RS            | KJN528718       |             | Accu Screws   | 4            | Camera stand to base mounting    |
| 30   | M5x10 screws                              | Accu Screws   |                 |             | Accu Screws   | 4            | Gripper                          |
| 31   | M2x12 screws                              | Accu Screws   |                 |             | Accu Screws   | 7            | Gripper                          |
| 32   | M4x15 screws                              | Accu Screws   |                 |             | Accu Screws   | 2            | Fingertips                       |
| 33   | Dowel                                     | Accu Screws   |                 | M2x12       | Accu Screws   | 4            | Fingertips                       |

|      |                                    | For 1 Cell with Base tiles |     |                                        |
|------|------------------------------------|----------------------------|-----|----------------------------------------|
| ITEM | Description                        | Manufacturer               | Qty | Notes                                  |
| 1    | Base Tile                          | Timberfusion               | 2   | Formica - Storm - F7912 Absolute Matte |
| 2    | Base Tile Corner                   | Timberfusion               | 1   | Formica - Storm - F7912 Absolute Matte |
| 3    | Base Tile Corner and Notch Drawing | Timberfusion               | 1   | Formica - Storm - F7912 Absolute Matte |

| ITEM | Description                                                                 | Manufacturer | Part Number          | Vendor        | Qty |
|------|-----------------------------------------------------------------------------|--------------|----------------------|---------------|-----|
| 1    | FTS300 + cable                                                              | Robotiq      | FTS-300-KIT-001      | Active Robots | 1   |
| 2    | RS485USB converter for gripper                                              | Robotiq      | ACC-ADT-USB-RS485    | Active Robots | 2   |
| 3    | Gripper                                                                     | Robotiq      | Robotiq 2F85 Gripper | Active Robots | 1   |
| 4    | Fingertips                                                                  | N/A          | 3D Model             | N/A           | 2   |
| 5    | adapter Sawyer-flange to FTS                                                | Robotiq      | FTS-300-CPL-064      | Active Robots | 1   |
| 6    | adapter Sawyer Gripper coupling + cable                                     | Robotiq      | AGC-CPL-062-002      | Active Robots | 1   |
| 7    | Sawyer Robot Cable, Pushpull RJ45, 2 Meter                                  | Robotiq      |                      | Active Robots | 1   |
| 8    | Sawyer Robot E-Stop Incl. Cable                                             | Active 8     |                      | Active Robots | 1   |
| 9    | <a href="#">Hybrid PWR/RJ45 Harting with one end straight connector, 2m</a> | Active 8     | 70025                | Active Robots | 1   |
| 10   | USB to RS485 adapter                                                        | Robotiq      | ACC-ADT-USB-RS485 -  | Active Robots | 2   |
| 11   | 2m Cat 7 RJ45 Cable, Flat Gigabit Lan Network Patch Cord 10Gbps             | Scan         |                      | Scan          | 2   |
| 12   | 3m Cat 7 RJ45 Cable, Flat Gigabit Lan Network Patch Cord 10Gbps             | Scan         |                      | Scan          | 4   |
| 13   | 2m Power Cable, C13, IEC to C14,                                            | RS           | 487-277              | RS Components | 4   |

| ITEM | Description           | Manufacturer | Part Number   | Details     | Qty |
|------|-----------------------|--------------|---------------|-------------|-----|
| 1    | Leg Adaptor Plate     | 3D Hubs      | CNC Machining | Alu 6061-T6 | 5   |
| 2    | Sawyer Mounting Plate | 3D Hubs      | CNC Machining | Alu 7075    | 1   |

| ITEM | Description | Manufacturer | Part Number | Details                          | Qty |
|------|-------------|--------------|-------------|----------------------------------|-----|
| 1    | Basket      | cutlaser     | cut         | 5mm Perspex Grey Frost - S2 9643 | 5   |
| 2    | Feet        | cutlaser     | cut         | 6mm Ply                          | 1   |

| ITEM | Description                                                  | Part Number     | Details              | Qty per Cell |
|------|--------------------------------------------------------------|-----------------|----------------------|--------------|
| 1    | Sawyer Robot arm                                             | 59768           |                      | 1            |
| 2    | Sawyer Control Box                                           |                 |                      | 1            |
| 3    | Blickle Caster with Stop                                     | HRLK-ALTH 100K  | 887636               | 5            |
| 4    | Basler Ace acA1920-40gc camera                               |                 |                      | 3            |
| 5    | LENS TS0814-MP F1.4 F8mm 1"                                  |                 |                      | 2            |
| 6    | HellermannTyton Braided Black Cable Sleeve, 13mm Diameter,5m | 802-6114        |                      | 1            |
| 6    | LENS TS1214-MP F1.4 F12.5mm 1"                               |                 |                      | 1            |
| 7    | Bosch Rexroth Cover Strip, PVC, 10mm Slot, Black, 20pcs x 1m | 418-0863        |                      | 1            |
| 8    | Set of Allen Keys                                            |                 | <a href="#">Link</a> | 1            |
| 9    | Spanner Set                                                  |                 | <a href="#">Link</a> | 1            |
| 10   | T45 torx driver                                              |                 | <a href="#">Link</a> | 1            |
| 11   | PULS DIN Rail Power Supply, 24V dc Output Voltage            | 123-8020        |                      | 1            |
| 12   | Cisco 48 port Network Switch with UPOE                       | WS-C3850-12X48U |                      | 1            |
|      |                                                              |                 |                      |              |
