# Supplementary material
Source: ML conference proceedings conference paper supplement (https://proceedings.mlr.press/v164/lee22b.html)
Supplement: Supplementary file 8 [file lee22b-supp.zip]

Archive with 19 entries (17 files):
- BeyondPickAndPlace-SupplementaryRevision/
- BeyondPickAndPlace-SupplementaryRevision/RGBStacking-AppendixRevision1.pdf
- BeyondPickAndPlace-SupplementaryRevision/real-cell-documentation/
- BeyondPickAndPlace-SupplementaryRevision/real-cell-documentation/Assembly Instructions -- Basket and Camera setup.pdf
- BeyondPickAndPlace-SupplementaryRevision/real-cell-documentation/Assembly Robot instruction.pdf
- BeyondPickAndPlace-SupplementaryRevision/real-cell-documentation/RGB Stacking - Paper -- Robot Cell Assembly.pdf
- BeyondPickAndPlace-SupplementaryRevision/real-cell-documentation/RGB Stacking Paper -- BOM Robotics cell.pdf
- BeyondPickAndPlace-SupplementaryRevision/real-cell-documentation/RGB Stacking Paper -- Standard Cell Generic Setup.pdf
- __MACOSX/._BeyondPickAndPlace-SupplementaryRevision
- __MACOSX/BeyondPickAndPlace-SupplementaryRevision/._BeyondPickAndPlace-Video_updated.mp4
- __MACOSX/BeyondPickAndPlace-SupplementaryRevision/._RGBStacking-AppendixRevision1.pdf
- __MACOSX/BeyondPickAndPlace-SupplementaryRevision/._real-cell-documentation
- __MACOSX/BeyondPickAndPlace-SupplementaryRevision/._unseen_diverse_objects_successful.mp4
- __MACOSX/BeyondPickAndPlace-SupplementaryRevision/._unseen_diverse_objects_unsuccessful.mp4
- __MACOSX/BeyondPickAndPlace-SupplementaryRevision/real-cell-documentation/._Assembly Instructions -- Basket and Camera setup.pdf
- __MACOSX/BeyondPickAndPlace-SupplementaryRevision/real-cell-documentation/._Assembly Robot instruction.pdf
- __MACOSX/BeyondPickAndPlace-SupplementaryRevision/real-cell-documentation/._RGB Stacking - Paper -- Robot Cell Assembly.pdf
- __MACOSX/BeyondPickAndPlace-SupplementaryRevision/real-cell-documentation/._RGB Stacking Paper -- BOM Robotics cell.pdf
- __MACOSX/BeyondPickAndPlace-SupplementaryRevision/real-cell-documentation/._RGB Stacking Paper -- Standard Cell Generic Setup.pdf
