# Supplementary material
Source: ML conference proceedings conference paper supplement (https://proceedings.mlr.press/v164/lee22b.html)

# Standard Cell Generic Setup

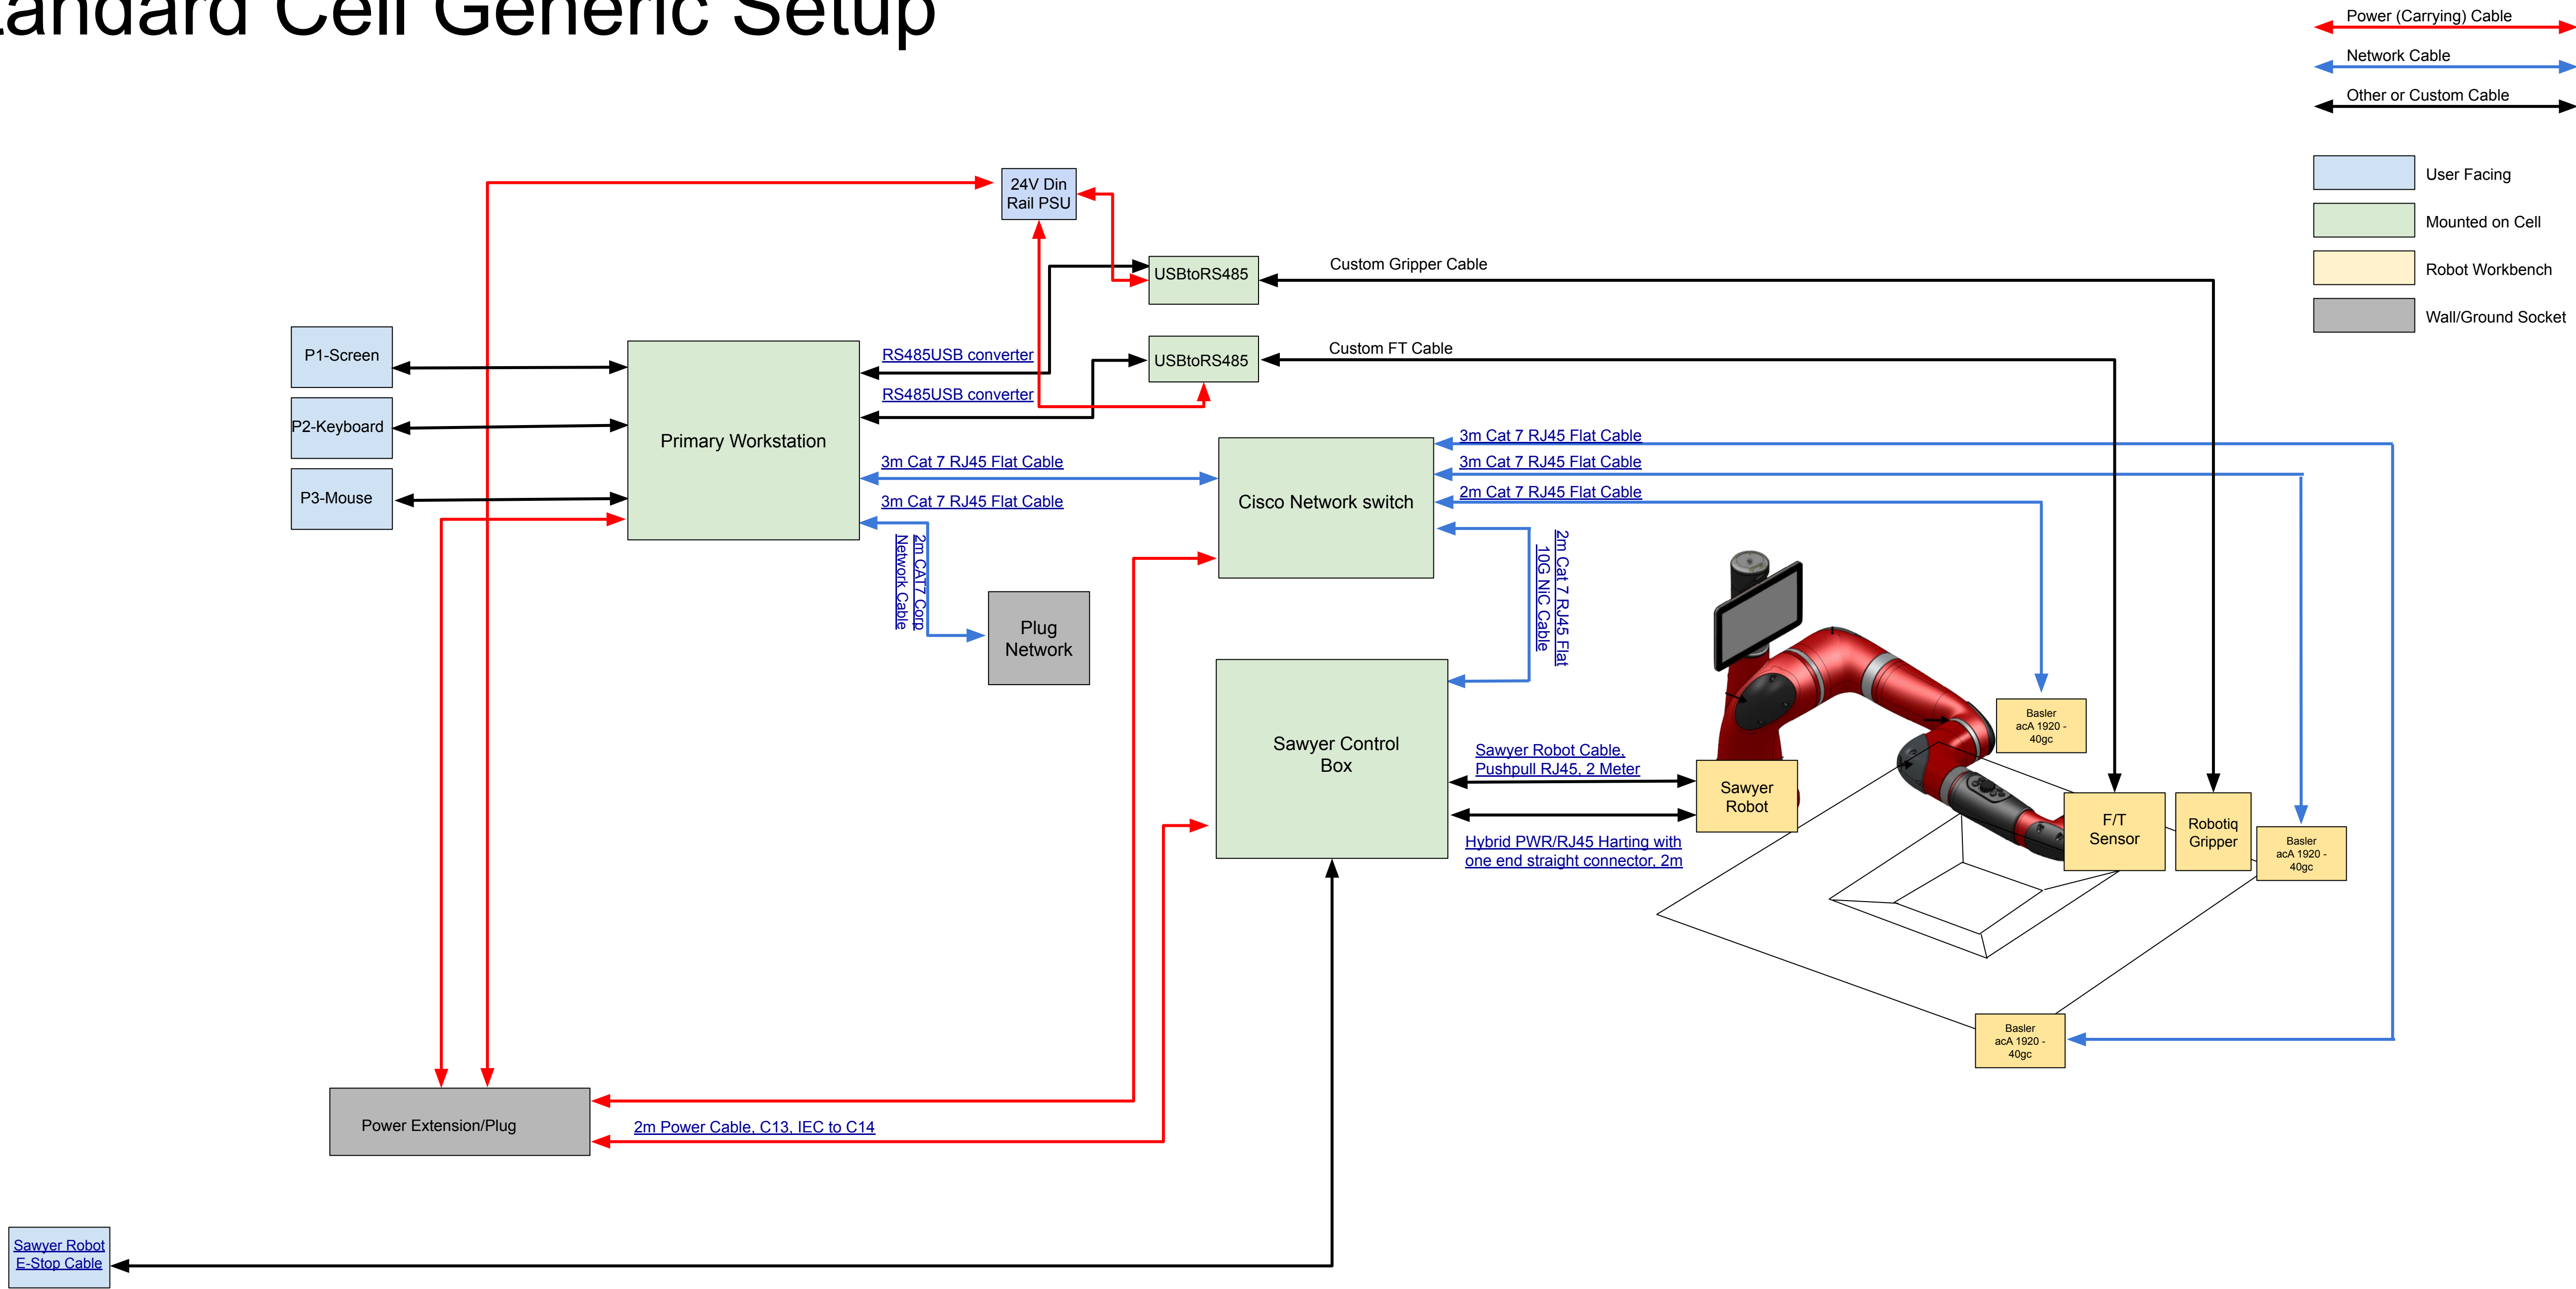

Supplement: Supplementary file 3 [file lee22b-supp.zip]
